37           **SUMMARY**

38           The use of alternative translation initiation sites enables production of more  
39 than one protein from a single gene, thereby expanding cellular proteome.  
40 Although several such examples have been serendipitously found in bacteria,  
41 genome-wide mapping of alternative translation start sites has been unattainable.  
42 We found that the antibiotic retapamulin specifically arrests initiating ribosomes at  
43 start codons of the genes. Retapamulin-enhanced Ribo-seq analysis (Ribo-RET)  
44 not only allowed mapping of conventional initiation sites at the beginning of the  
45 genes but, strikingly, it also revealed putative internal start sites in a number of  
46 *Escherichia coli* genes. Experiments demonstrated that the internal start codons  
47 can be recognized by the ribosomes and direct translation initiation in vitro and in  
48 vivo. Proteins, whose synthesis is initiated at an internal in-frame and out-of-frame  
49 start sites, can be functionally important and contribute to the 'alternative' bacterial  
50 proteome. The internal start sites may also play regulatory roles in gene expression.

51

52           **INTRODUCTION**

53           A broader diversity of proteins with specialized functions can augment cell  
54 reproduction capacity, optimize its metabolism and facilitate survival in the ever-  
55 changing environment. However, the fitness gain from acquiring a capacity of  
56 making a new protein is counterbalanced with the cost of expanding the size of the  
57 genome. This conundrum is particularly onerous in bacteria whose genomes are  
58 highly streamlined. Furthermore, expanding the protein repertoire by gene  
59 duplication and subsequent specialization could be precarious because similar  
60 nucleotide sequences are prone to homologous recombination leading to genome  
61 instability (Birch et al., 1991; Koressaar and Remm, 2012).

62           In order to overcome the genome expansion constraints, bacteria have  
63 evolved several strategies for diversifying their proteome without expanding the  
64 size of the genome. Some of these strategies, collectively known as recoding,  
65 commonly require deviations from the standard rules of translation (Atkins et al.,  
66 2016; Baranov et al., 2015). In the recoding scenarios, translation of the nucleotide  
67 sequence is initiated at a unique start codon of an open reading frame (ORF), but  
68 due to programmed ribosomal frameshifting or stop codon readthrough, a fraction  
69 of ribosomes produces a polypeptide whose sequence deviates from that encoded  
70 in the main ORF, leading to generation of more than one protein from a single  
71 gene.

72           Another possible way for producing diverse polypeptides from a single ORF  
73 and, in this case, without deviating from the canonical rules of decoding, is the  
74 utilization of alternative internally located start codons.

75           While locating the start codon of a protein coding sequence is one of the  
76 most critical functions of the ribosome, the rules for translation initiation site (TIS)  
77 recognition are fairly flexible. Even though AUG is the most commonly used start  
78 codon, other triplets such as GUG, UUG, CUG, AUU and AUC, that differ from  
79 AUG by a single nucleotide, can be also decoded by the initiator fMet-tRNA and  
80 can direct with varying efficiencies initiation of translation (Villegas and Kropinski,  
81 2008). In bacterial genes, the start codon is often preceded by a Shine-Dalgarno  
82 (SD) sequence, which is complementary to the nucleotide sequence at the 3' end  
83 of the 16S rRNA (Shine and Dalgarno, 1975). The presence of a SD sequence,  
84 however, is neither sufficient, nor always required for efficient translation initiation  
85 (Gualerzi and Pon, 2015; Li et al., 2014; Moll et al., 2002; Woolstenhulme et al.,  
86 2015). The mRNA spatial structure (Gualerzi and Pon, 2015; Kozak, 2005) also  
87 modulates the efficiency of the start codon recognition, but the extent of its  
88 contribution, as well as the role of other yet unknown mRNA features, remain  
89 poorly understood (Espah Borujeni et al., 2014; Li et al., 2014; Osterman et al.,  
90 2013; Vimberg et al., 2007). The flexible rules of start codon selection should make  
91 it difficult for the cell to completely avoid occasional initiation of translation at some  
92 internal codons. If this is really the case, certain internal start sites and the resulting  
93 protein products could be subject of the evolutionary selection and, thus, could be  
94 retained and optimized to eventually benefit the host cell.

95           Although translation of the majority of the bacterial genes is initiated at a  
96 unique TIS, designated herein as primary (pTIS), several examples of genes with  
97 an additional internal TIS (iTIS) have been serendipitously discovered, usually

98 during the purification and functional characterization of the primary protein  
99 (reviewed in (Meydan et al., 2018)). In these genes, translation initiated at the pTIS  
100 results in production of the full-length (primary) protein, while ribosomes which  
101 initiate translation at the in-frame iTIS synthesize an alternative, N-terminally  
102 truncated, polypeptide. Such primary and alternative proteins may have related but  
103 specialized functions. One of the first examples of internal initiation have been  
104 found within the *Escherichia coli* gene *infB* encoding translation initiation factor 2  
105 (IF2). Initiation of *infB* translation either at the pTIS or iTIS leads to production of  
106 two IF2 isoforms with potentially distinct roles in cell physiology (Miller and Wahba,  
107 1973; Nyengaard et al., 1991; Sacerdot et al., 1992). The products of in-frame  
108 internal initiation at several other bacterial genes have been reported to participate  
109 in various cellular functions ranging from virulence, to photosynthesis, or antibiotic  
110 production among others (reviewed in (Meydan et al., 2018)). In very few known  
111 cases, iTIS directs translation in a reading frame different from the primary ORF  
112 (D'Souza et al., 1994; Feltens et al., 2003; Yuan et al., 2018). The amino acid  
113 sequence and likely the function of a protein whose translation starts from an out-  
114 of-frame (OOF) internal start codon of a gene, would completely deviate from those  
115 of the primary protein (Feltens et al., 2003).

116 The majority of the few reported examples of translation of a protein from  
117 an iTIS have been discovered accidentally. Doubtlessly, most of the cases of  
118 alternative translation initiation remain enigmatic primarily due to the lack of  
119 systematic and robust approaches for detecting true start codons in bacterial  
120 genomes. Although several computational algorithms have successfully predicted

121 the pTIS of many bacterial ORFs (Gao et al., 2010; Giess et al., 2017; Makita et  
122 al., 2007; Salzberg et al., 1998), iTIS prediction remains by far more challenging  
123 and has not even been pursued in most of those studies. The recent advent of new  
124 mass-spectrometry-based approaches have allowed the identification of N-  
125 terminal peptides of a range of proteins expressed in some bacterial species  
126 (Bienvenut et al., 2015; Impens et al., 2017). The resulting datasets revealed some  
127 peptides that likely originated from proteins whose translation initiates at an iTIS.  
128 However, the utility of the available mass-spectrometry techniques is intrinsically  
129 restricted due to the stringent requirements for the chemical properties, size, and  
130 abundance of the peptides that can be detected (Berry et al., 2016). Therefore,  
131 these methodologies had so far only limited success in identifying the protein  
132 products whose translation starts at an iTIS.

133 Ribosome profiling (Ribo-seq), based on deep sequencing of ribosome  
134 protected mRNA fragments (“ribosome footprints”), allows for genome-wide survey  
135 of translation (Ingolia et al., 2009). Ribo-seq experiments carried out with  
136 eukaryotic cells pre-treated with the translation initiation inhibitors harringtonine  
137 (Ingolia et al., 2011) and lactimidomycin (Gao et al., 2015; Lee et al., 2012) or with  
138 puromycin (Fritsch et al., 2012) showed specific enrichment of ribosome footprints  
139 at start codons of ORFs and facilitated mapping of TISs in eukaryotic genomes.  
140 These studies also revealed active translation of previously unknown short ORFs  
141 in the 5' UTRs of many genes, significantly expanding the repertoire of the  
142 regulatory upstream ORFs. In addition, the presence of TISs within some of the  
143 coding regions in eukaryotic genomes was noted, where they were attributed

144 primarily to leaky scanning through the primary start codons (Lee et al., 2012).  
145 Analogous studies, however, have been difficult to conduct in bacteria because of  
146 the paucity of inhibitors with the required mechanism of action. An inhibitor useful  
147 for mapping start sites should allow the assembly of the 70S translation initiation  
148 complex at a TIS but must prevent the ribosome from leaving the start codon.  
149 Unfortunately, most of the ribosomal antibiotics traditionally viewed as initiation  
150 inhibitors do not satisfy these criteria. Some of them (e.g. edeine or kasugamycin),  
151 interfere with binding of the ribosome to mRNA (Wilson, 2009) and thus are of little  
152 utility for TIS mapping. Other antibiotics, like thiostrepton or hygromycin A, may  
153 inhibit initiation of protein synthesis (Brandi et al., 2004; Polikanov et al., 2015), but  
154 these effects are only collateral to their ability of arresting the elongating ribosome  
155 (Cameron et al., 2002; Guerrero and Modolell, 1980) and, therefore, these  
156 compounds cannot be used for selective mapping of the sites of translation  
157 initiation on mRNAs. Recently, tetracycline (TET), an antibiotic that prevents  
158 aminoacyl-tRNAs from entering the ribosomal A site (Blanchard et al., 2004;  
159 Brodersen et al., 2000; Pioletti et al., 2001) and commonly known as an elongation  
160 inhibitor (Cundliffe, 1981), was used in conjunction with Ribo-seq to globally map  
161 pTISs in the *E. coli* genome (Nakahigashi et al., 2016). Although TET Ribo-seq  
162 data successfully revealed the pTISs of many of the actively translated genes,  
163 identification of iTISs was not performed in that work. Moreover, because TET can  
164 inhibit not only initiation, but also elongation of translation (Cundliffe, 1981; Orelle  
165 et al., 2013), it is impossible to distinguish whether the TET-generated peaks of  
166 ribosome density within the ORFs represented paused elongating ribosomes or

167 ribosome initiating at an iTIS (Nakahigashi et al., 2016). Therefore, identifying an  
168 inhibitor that can specifically and selectively arrest the initiating ribosomes would  
169 provide an invaluable tool for mapping all TISs, primary or internal, in bacterial  
170 genomes.

171 Here we show that the antibiotic retapamulin (RET), a representative of the  
172 pleuromutilin class of protein synthesis inhibitors, exclusively stalls the ribosomes  
173 at the start codons of the ORFs. Brief pre-treatment of *E. coli* cells with RET  
174 dramatically rearranges the distribution of ribosomes along the ORFs, confining  
175 the ribosomal footprints obtained by Ribo-seq to the TISs of the genes. Strikingly,  
176 the application of the Ribo-seq/RET (Ribo-RET) approach to the analysis of  
177 bacterial translation revealed that more than a hundred of *E. coli* genes contain  
178 actively used iTISs. In vitro and in vivo experiments confirmed initiation of  
179 translation at some of the discovered iTISs and show that internal initiation may  
180 lead to production of proteins with distinct functions. Evolutionary conservation of  
181 some of the iTISs provide additional support for their functional significance. The  
182 obtained data show that alternative initiation of translation is widespread in bacteria  
183 and reveal a possible existence of the previously cryptic fraction of the bacterial  
184 proteome.

185

## 186 **RESULTS**

### 187 **RET arrests the initiating ribosome at the start codons**

188 Pleuromutilin antibiotics, including clinically-used semi-synthetic RET, bind in the  
189 peptidyl transferase center (PTC) of the bacterial ribosome where they hinder the



190 placement of the P- and A-site amino acids (Figure S1A and S1B), thus preventing  
191 peptide bond formation (Davidovich et al., 2007; Poulsen et al., 2001; Schlunzen  
192 et al., 2004). In vitro studies have shown that presence of fMet-tRNA and RET in  
193 the ribosome are not mutually exclusive (Yan et al., 2006). Therefore, we reasoned  
194 that RET may allow the assembly of the 70S initiation complex at the start codon,  
195 but by displacing the aminoacyl moiety of the initiator fMet-tRNA and interfering  
196 with the placement of the elongator aminoacyl-tRNA in the A site, it could prevent  
197 formation of the first peptide bond.

198         The results of polysome analysis was compatible with the view of RET being  
199 a selective inhibitor of translation initiation, because treatment of *E. coli* cells with  
200 high concentrations of RET, 100-fold over the minimal inhibitory concentration  
201 (MIC), led to a rapid conversion of polysomes into monosomes (Figure S1C). We  
202 then carried out toeprinting experiments (Hartz et al., 1988; Orelle et al., 2013) in  
203 order to test whether RET could indeed capture ribosomes at start codons. When  
204 model genes were translated in an *E. coli* cell-free system (Shimizu et al., 2001),  
205 addition of RET resulted in ribosome stalling exclusively at the start codons of the  
206 ORFs (Figure 1A, 'RET' lanes), demonstrating that this antibiotic readily, and  
207 possibly specifically, inhibits translation initiation. In contrast, TET, which was used  
208 previously to map TISs in the *E. coli* genome (Nakahigashi et al., 2016), halted  
209 translation not only at the translation initiation sites but also at downstream codons  
210 of the ORFs (Figure 1A, 'TET' lanes), confirming its ability to interfere with both  
211 initiation and elongation phases of protein synthesis (Orelle et al., 2013).

212           The outcomes of the polysome- and toeprinting analyses, and structural  
213 data showing the incompatibility of the extended nascent protein chain with RET  
214 binding (Figure S1B), encouraged us to assess by Ribo-seq whether RET can be  
215 used for mapping translation start sites in the living bacterial cells. Even though a  
216 brief 2 min exposure of the  $\Delta toIC$  derivative of the *E. coli* strain BW25113 to a 32-  
217 fold MIC of RET was sufficient to nearly completely halt protein synthesis (Figure  
218 S1D), Ribo-seq experiments were carried out by incubating cells with 100-fold MIC  
219 concentration of the antibiotic for 5 min in order to ensure efficient drug binding  
220 and providing the elongating ribosomes enough time to complete translation of  
221 even long or slowly-translated mRNAs prior to cell harvesting. Analysis of the  
222 resulting Ribo-seq data showed that the treatment of *E. coli* with RET led to a  
223 striking redistribution of the translating ribosomes along the ORFs. The occupancy  
224 of the internal and termination codons of the expressed genes was severely  
225 reduced compared to the untreated control, whereas the ribosome density peaks  
226 at the start codons dramatically increased (Figure 1B and 1C). Although a  
227 generally similar trend can be observed in the metagene analysis of the Ribo-seq  
228 data in the RET- (this paper) and TET-treated cells (Nakahigashi et al., 2016), the  
229 start-codon peak in the TET experiments is smaller and broader compared to the  
230 peak of the RET-stalled ribosomes (Figure S1E and S1F), reflecting a higher  
231 potency of RET as initiation inhibitor. By applying fairly conservative criteria (see  
232 STAR Methods), we were able to detect the distinct peaks of ribosome density at  
233 the annotated start codons (pTISs) of 991 out of 1153 (86%) *E. coli* genes  
234 expressed in the BW25113 strain under our experimental conditions in the

235 absence of antibiotic. The 86% success rate in pTIS mapping confirmed the power  
236 of the approach for identifying translation start sites in bacterial genes. The  
237 magnitude of the start codon peaks at the remaining 14% of the genes did not pass  
238 our strict 'minimal number of reads' threshold (see STAR Methods) likely reflecting  
239 in part possible changes in gene expression upon addition of RET. The number of  
240 the recognizable pTISs could be evidently expanded by increasing the depth of  
241 sequencing of the Ribo-seq libraries.

242       Taken together, our in vitro and in vivo results showed that RET acts as a  
243 specific inhibitor of bacterial translation initiation and in combination with Ribo-seq  
244 can be used for mapping the pTISs of the majority of actively translated genes in  
245 bacterial genomes. We named the Ribo-seq/RET approach 'Ribo-RET'.

246

### 247 **Ribo-RET unmasks initiation of translation at internal codons of many** 248 **bacterial genes**

249 The majority of the ribosome footprints in the Ribo-RET dataset mapped to the  
250 annotated pTISs. Strikingly, in a number of genes we also observed peaks at  
251 certain internal codons (Figure 2A). Hypothetically, the presence of internal Ribo-  
252 RET peaks could be explained by pausing of elongating ribosomes at specific sites  
253 within the ORF, if the stall does not resolve during the time of antibiotic treatment.  
254 Nonetheless, this possibility seemed unlikely, because we did not detect any  
255 substantial Ribo-RET peak even at the most prominent programmed translation  
256 arrest site in the *E. coli* genome within the *secM* ORF (Nakatogawa and Ito, 2002)  
257 (Figure S1G). The likelihood that the internal RET peaks originated from context-

258 specific translation elongation arrest observed with some other protein synthesis  
259 inhibitors (Kannan et al., 2014; Marks et al., 2016) was similarly implausible  
260 because biochemical (Dornhelm and Hogenauer, 1978) and structural (Davidovich  
261 et al., 2007) data strongly argue that RET cannot bind to the elongating ribosome  
262 (Figure S1B). We concluded, therefore, that the Ribo-RET peaks at internal sites  
263 within ORFs must represent ribosomes caught in the act of initiating translation.

264 Three *E. coli* genes, *infB*, *mcrB* and *clpB*, have been previously reported to  
265 encode two different polypeptide isoforms; in each of these genes the translation  
266 of the full-size protein is initiated at the pTIS while the shorter isoform is expressed  
267 from an iTIS (Broome-Smith et al., 1985; Park et al., 1993; Plumbridge et al., 1985).  
268 Examination of the Ribo-RET profile within these genes showed well-defined and  
269 highly-specific peaks of ribosome density (Figure 2B) at the previously  
270 experimentally verified iTISs. This result proved the utility of Ribo-RET for mapping  
271 iTISs in bacterial genes and provided independent evidence that the RET peaks  
272 at internal codons represent initiating ribosomes.

273 Among the *E. coli* BW25113 genes expressed in our conditions, we  
274 identified 239 that contain at least one iTIS characterized by the presence of a  
275 ribosome density peak whose size is at least 10% relative to the pTIS peak in the  
276 same gene. To further expand the systematic identification of *E. coli* genes with  
277 internal translation start sites, we applied the Ribo-RET approach to the  $\Delta toIC$   
278 derivative of the BL21*E. coli* strain, the B-type variant which is genetically distinct  
279 from the K-strain BW25113 (Grenier et al., 2014; Studier et al., 2009) used in the  
280 original Ribo-RET experiment. Similar to our findings with the BW25113 cells,

281 Ribo-RET analysis identified a number of genes in the BL21 strain with well-  
282 defined iTISs. Of these, 124 iTISs were common between the two strains (Table  
283 S1). Additional 115 Ribo-RET iTIS peaks exclusively identified in the BW25113  
284 cells and 496 Ribo-RET peaks specific for the BL21 cells may represent strain-  
285 specific iTISs candidates (Table S1). We limited our subsequent analysis to the  
286 iTISs conserved between the two strains, among which, 42 directed translation in  
287 frame with the main gene whereas start codons of the remaining 74 iTISs were out  
288 of frame relative to the main ORF (Figure 2C and Table S1). In the following section  
289 we will consider these two classes separately.

290

#### 291 **Internal translation initiation sites that are in frame with the main ORF**

292 The in-frame iTISs exploit various initiator codons that have been shown previously  
293 to be capable of directing translation initiation in *E. coli* (Chengguang et al., 2017;  
294 Hecht et al., 2017), although similar to the pTISs, the AUG codon is the most  
295 prevalent (Figure 3A). A SD-like sequence could be recognized in front of many of  
296 in-frame internal start codons (Table S1).

297 A polypeptide whose synthesis is initiated at an in-frame iTIS would  
298 represent an N-terminally truncated form of the primary protein. The candidate  
299 proteins resulting from in-frame internal initiation encompass a wide range of sizes,  
300 from 6 to 805 amino acids in length (Table S1). The locations of the in frame iTISs  
301 within the main ORFs vary but, in general, they show a bimodal distribution with a  
302 large number of internal start sites clustering close to the beginning of the gene  
303 while others are within the 3' terminal quartile of the ORF length (Figure 3B). As a

304 representative example of a 3'-proximal iTIS, we selected that of the *arcB* gene,  
305 while the iTIS of *speA* was examined as the case of a 5'-proximal start site.

306

307 **3'-proximal internal initiation can generate an isoform of the primary protein**  
308 **with specialized functions**

309 The gene *arcB* encodes the membrane-anchored sensor kinase ArcB of the  
310 two-component signal transduction system ArcB/A that helps bacteria to sense  
311 and respond to changes in oxygen concentration (Alvarez and Georgellis, 2010)  
312 (Figure 3C and 3D). The ArcB protein consists of the transmitter, receiver and  
313 phosphotransfer domains (Figure 3D). Under microaerobic conditions, ArcB  
314 undergoes a series of phosphorylation steps and eventually transfers a phosphoryl  
315 group to the response regulator ArcA that controls expression of nearly 200 genes  
316 (Alvarez and Georgellis, 2010; Salmon et al., 2005). ArcB-C, the C-terminal  
317 phosphotransfer domain of the membrane-bound ArcB is the ultimate receiver of  
318 the phosphoryl group within the ArcB protein and serves as the phosphoryl donor  
319 for ArcA (Alvarez et al., 2016).

320 Our Ribo-RET data showed a strong ribosome density peak at an iTIS in  
321 *arcB*, with the putative start codon GUG located precisely at the boundary of the  
322 segment encoding the ArcB-C domain (Figure 3C, D). This observation suggested  
323 that initiation of translation at the *arcB* iTIS could generate a diffusible ArcB-C  
324 polypeptide corresponding to the C-terminal domain of the membrane-anchored  
325 ArcB kinase (Figure 3D). To test this possibility, we introduced the 3xFLAG-coding  
326 sequence at the 3' end of the *arcB* gene, expressed it from a plasmid in *E. coli*

327 cells and analyzed the protein products by Western-blotting. Expression of the  
328 tagged *arcB* resulted in the simultaneous production of two proteins: the full-size  
329 ArcB and a second, smaller polypeptide, whose apparent molecular weight of 14  
330 kDa is consistent with that of FLAG-tagged ArcB-C (Figures 3E and S2A).  
331 Disruption of the *arcB* iTIS by synonymous mutations at the start codon and the  
332 upstream SD-like sequence did not affect the synthesis of the full-length ArcB but  
333 abrogated the production of ArcB-C (Figure 3E). These results demonstrate that  
334 the iTIS within the *arcB* gene may indeed be utilized in the cell for synthesis of a  
335 stand-alone ArcB-C protein, detached from the membrane-bound ArcB (Figure  
336 3F). It has been previously shown that the isolated ArcB-C transmitter domain is  
337 capable of serving in vitro as a phosphoryl acceptor for the ArcB-catalyzed  
338 phosphorylation reaction and then can catalyze the phosphoryl transfer to ArcA  
339 (Alvarez and Georgellis, 2010), supporting the idea that a self-standing ArcB-C  
340 protein is likely also functional in vivo. Diffusible ArcB-C may either facilitate the  
341 operation of the ArcB-ArcA signal transduction pathway or could possibly  
342 phosphorylate other response regulators enabling a cross-talk with other signal  
343 transduction systems of the cell (Yaku et al., 1997) (Figure 3F). The functional  
344 significance of producing the full-size ArcB sensory kinase and an independent  
345 ArcB-C phosphotransfer domain from the same gene is further supported by  
346 preservation of the *arcB* iTIS among several bacterial species (Figure S2B).

347         The expression of ArcB-C from the *arcB* iTIS is apparently quite efficient  
348 because in *E. coli* and *Salmonella enterica* Ribo-seq datasets obtained in the  
349 absence of RET, an upshift in the ribosome density can be observed at the *arcB*

350 codons located downstream from the iTIS (Baek et al., 2017; Kannan et al., 2014;  
351 Li et al., 2014) (Figure S2C-S2F). Curiously, the average ribosome occupancy of  
352 the *arcB* codons before and after the iTIS vary under different physiological  
353 conditions (Figure S2E and S2F), suggesting that the relative efficiency of  
354 utilization of the *arcB* pTIS and iTIS could be regulated.

355 Another remarkable example of a 3'-proximal iTIS that likely directs  
356 production of a functional protein is found in homologous *rpnA*, *rpnB*, *rpnC*, *rpnD*  
357 and *rpnE* genes found in the *E. coli* genome that encode nucleases involved in  
358 DNA recombination (Kingston et al., 2017). All the *rpn* genes in the *E. coli* show  
359 Ribo-RET peaks corresponding to in-frame iTISs that appear to be the major  
360 initiation sites of each of these genes (Figure S2G), at least under the growth  
361 conditions of our experiments. Strikingly, an alternative polypeptide expressed  
362 from an in-frame iTIS in one of these genes (*rpnE*) is 98% identical to the product  
363 of an independent *ypaA* gene (Figure S2H) revealing distinct functionality of the  
364 products of the internal initiation within the genes of the *rpn* family.

365

### 366 **5'-proximal iTIS gene may generate differentially-targeted proteins**

367 Twenty-two (52%) of the conserved in-frame *E. coli* iTISs are within the first  
368 quarter of the length of the main gene. In 18 of these 22 genes, the iTIS is located  
369 within the first 10% of the ORF length (Figure 3B). Compared to the main protein  
370 product of a gene, an alternative polypeptide generated from a 5'-proximal iTIS  
371 would lack only few N-terminal amino acid residues. The functions of such a  
372 protein would likely be very similar to those of the primary gene product, raising



373 the question of whether the presence of a secondary, 5'-proximal, iTIS within the  
374 gene could benefit the cell.

375 We examined the Ribo-RET-detected 5'-proximal iTIS of *speA*, the gene  
376 that encodes arginine decarboxylase, an enzyme involved in polyamine production  
377 (Michael, 2016). Arginine decarboxylase (SpeA) has been found in the *E. coli*  
378 cytoplasmic and periplasmic fractions (Buch and Boyle, 1985) and was reported  
379 to be represented by two polypeptide isoforms, SpeA-74, with an approximal  
380 molecular weight of 74 kDa, and a smaller one of ~ 70 kDa, SpeA-70 (Buch and  
381 Boyle, 1985; Wu and Morris, 1973). The latter protein was suggested to be a  
382 product of co-secretional maturation of the full-length SpeA-74 (Buch and Boyle,  
383 1985). Our analysis, however, revealed two Ribo-RET peaks in the *speA* ORF:  
384 one corresponding to the annotated pTIS and the second one mapped to an iTIS  
385 at codon Met-26 (Figure S3A). Initiation of translation at the pTIS and iTIS of *speA*  
386 would generate the 73,767 Da and 71,062 Da forms of SpeA, respectively, arguing  
387 that the SpeA-70 isoform is generated due to initiation of translation at the *speA*  
388 iTIS. In support of this conclusion, the peptide (M)SSQEASKMLR, which precisely  
389 corresponds to the N-terminus of the short SpeA isoform defined by Ribo-RET,  
390 can be found in the database of the experimentally-identified *E. coli* N-terminal  
391 peptides (Bienvenut et al., 2015).

392 Previous studies suggested that SpeA-74 is targeted to the periplasm due  
393 to the presence of a putative N-terminal secretion signal sequence (Buch and  
394 Boyle, 1985). A segment of this signal sequence would be missing in the SpeA-70  
395 isoform and therefore this shorter polypeptide would be confined to the cytoplasm

396 (Figure S3B). Therefore, utilization of the 5'-proximal iTIS of *speA* would result in  
397 retaining a fraction of SpeA enzyme in the cytoplasm. The 5'-proximal iTISs  
398 identified in some other *E. coli* genes encoding secreted proteins (e.g. *bamA*, *ivy*  
399 or *yghG* (Stegmeier and Andersen, 2006; Strozen et al., 2012; Wasinger and  
400 Humphery-Smith, 1998), may serve similar purposes since initiation from the  
401 internal start codons would partially eliminate the predicted signal sequences from  
402 the polypeptide (Figure S3C). A similar strategy for targeting polypeptide isoforms  
403 to different cellular compartments has been described for few other bacterial  
404 proteins (reviewed in (Meydan et al., 2018)).

405 Six of the 5'-proximal iTISs (marked by asterisks in Figure 3B) have been  
406 detected previously by TET Ribo-seq and suggested to represent incorrectly  
407 annotated primary translation start sites (Nakahigashi et al., 2016). Some of the  
408 5'-proximal internal initiation site candidates may indeed correspond to mis-  
409 annotated pTISs because no ribosome density peaks were observed at the pTISs  
410 of the corresponding genes in our Ribo-RET datasets (Table S1). However, such  
411 conclusion could be drawn only cautiously because the utilization of the upstream  
412 pTIS could depend on the growth conditions.

413 The comparison of Ribo-RET-identified in-frame iTISs among two *E. coli*  
414 strains show that many of them are strain specific, indicating high variability of the  
415 internal translation initiation landscape. Nevertheless, the evolutionary pressure is  
416 expected to impose some degree of preservation upon the iTISs that provide a  
417 competitive advantage for the cell. One such example is preservation of the iTIS  
418 within the *arcB* gene discussed earlier.

419 To assess conservation of other iTISs, we analyzed alignments of bacterial  
420 genes homologous to the *E. coli* genes containing internal in-frame start sites.  
421 Sequence logos and codon conservation plots indicated preservation of in-frame  
422 potential initiation sites and locally enhanced synonymous site conservation for  
423 several of the genes, including *phoH*, *speA*, *yebG*, *yfaD* and *yadD* (Figure S4A-  
424 S4E). However, it remains to be seen whether these conserved regions are  
425 relevant to promoting iTIS usage or simply represent unrelated cis-elements  
426 embedded within these genes. The other iTISs identified by Ribo-RET in the *E.*  
427 *coli* genome show a lower degree of evolutionary conservation and could have  
428 arisen in response to species-specific needs.

429

#### 430 **Ribo-RET identified iTISs that are out of frame relative to the main ORF**

431 Only two examples of OOF internal initiation in bacterial genes had been  
432 previously described: the *comS* gene in *Bacillus subtilis*, that is nested within the  
433 *srfAB* gene (D'Souza et al., 1994; Hamoen et al., 1995), and the *rpmH* gene, which  
434 in *Thermus thermophilus* resides within the *rnpA* gene (Feltens et al., 2003)  
435 (reviewed in (Meydan et al., 2018)). Our Ribo-RET analysis showed that 74 OOF  
436 iTISs are potentially exploited as alternative translation start sites in the examined  
437 *E. coli* BW25113 and BL21 strains. The majority of the predicted OOF iTISs  
438 contain AUG as a start codon, but other known initiation codons are also found  
439 with the frequencies resembling those in pTISs or in in-frame iTISs (Figure S5A).  
440 The location of the OOF iTISs varies significantly between the host genes and the

441 peptides generated by translation initiated at the predicted OOF iTISs would range  
442 in size from 2 to 84 amino acids (Figures 4A and S5B).

443 We selected two of the Ribo-RET-identified OOF iTIS candidates to  
444 examine if they indeed can direct initiation of translation. The *E. coli* genes *sfsA*  
445 and *birA* encode transcription regulators; *birA* also possesses biotin ligase activity  
446 (Eisenberg et al., 1982; Kawamukai et al., 1991). In the *birA* gene, the presence  
447 of an OOF UUG internal start site (overlapping the Leu<sub>300</sub> codon of the main frame)  
448 would direct translation of a 5-amino acid long peptide (Figure 4B). Internal  
449 initiation at the OOF AUG of the *sfsA* gene (overlapping the Leu<sub>95</sub> codon of the  
450 main ORF) would generate a 12 amino acid long peptide (Figure 4B). When the  
451 full-size *sfsA* and *birA* genes were translated in vitro, addition of RET to the  
452 reaction resulted not only in the appearance of toeprint bands at the pTISs of the  
453 corresponding genes (Figure S5C and S5D), but also at the OOF iTISs identified  
454 by Ribo-RET (Figures 4C, lanes 'RET', orange dots). Furthermore, the addition of  
455 the translation termination inhibitor Api137 (Florin et al., 2017) to the translation  
456 reactions led to the appearance of toeprint bands at the stop codons corresponding  
457 to the OOF ORFs, indicating that the ribosomes not only bind to the OOF start  
458 codons but do translate the entire alternative ORF (Figure 4C, lanes 'API',  
459 magenta triangles).

460 We further examined whether the alternative ORF in the *sfsA* gene is  
461 translated in vivo. For this purpose, we designed a dual red/green fluorescent  
462 proteins (RFP/GFP) reporter plasmid, where translation of the *gfp* gene is initiated  
463 at the OOF iTIS within the *sfsA* gene (Figure 4D). Introduction of the reporter

464 construct into *E. coli* cells resulted in active expression of the GFP protein (Figure  
465 4D, right panel), indicating that the OOF iTIS within the *sfsA* gene is indeed utilized  
466 for initiation of translation. This conclusion was further corroborated when  
467 mutations in the internal AUG start codon abolished GFP production (Figure 4D).  
468 The verified functionality of the OOF iTIS in the *sfsA* gene suggests that either the  
469 encoded protein products or the mere act of translation of the OOF ORFs may play  
470 a functional role.

471 An independent validation of the functional significance of one of the OOF  
472 iTISs identified by Ribo-RET came from a recent study aimed at characterizing *E.*  
473 *coli* proteins activated by heat-shock (Yuan et al., 2018). Among the tryptic  
474 peptides, one mapped to the *gnd* gene, which encodes 6-phosphogluconate  
475 dehydrogenase (6-PGD). Remarkably, the sequence of the identified peptide was  
476 encoded in the -1 frame but the location of the start codon from which translation  
477 of the alternative protein (named GndA) would initiate remained ambiguous (Yuan  
478 et al., 2018). Our Ribo-RET data not only validated those findings, but also  
479 revealed that the GndA translation initiates most likely at the UUG codon  
480 (overlapping the Ile<sub>97</sub> codon of *gnd*), which is preceded by a strong SD sequence  
481 (Figure 4E). Of note, the Ribo-RET peak that we observed at this iTIS was  
482 relatively small compared to the pTIS peak of the *gnd* gene; the efficiency of  
483 translation initiation at the iTIS likely becomes more pronounced under heat-shock  
484 conditions. Interestingly, the Ribo-RET signal that would reflect initiation of the  
485 *gndA* translation is absent in the Ribo-RET data collected with the BL21 strain,  
486 perhaps because due to a single nucleotide alteration within the SD sequence

487 preceding the OOF iTIS (Figure 4E). This observation illustrates the strain-  
488 specificity of expression of functional alternative proteins. In line with this  
489 conclusion, most of the OOF iTISs identified in the *E. coli* genome do not exhibit  
490 any significant evolutionary conservation. The strongest example that exhibits  
491 near-threshold significance of the OOF iTIS conservation is the *tonB* gene that  
492 encodes the periplasmic component of the system involved in transport of iron-  
493 siderophore complex and vitamin B12. Furthermore, the internal initiation at this  
494 site is apparently sufficiently strong to be observed as an upshift of the local density  
495 of ribosome footprints even in the Ribo-seq data collected from *E. coli* cells not  
496 treated with antibiotic (Figure S4F).

497

#### 498 **Start-Stop sites may modulate translation of the primary gene**

499 Among the 74 OOF iTIS candidates, our Ribo-RET data revealed 14 unique  
500 sites where the start codon is immediately followed by a stop codon (Table S1).  
501 We called these unique sites “Start-Stops”. Although start-stops have been  
502 identified in the 5’ UTRs of some viral and plant genes and have been suggested  
503 to play regulatory functions (Krummheuer et al., 2007; Tanaka et al., 2016),  
504 operational Start-Stops have not been previously reported within the bacterial or  
505 archaeal genes.

506 We selected the identified start-stops within the genes *yecJ* and *hsIR*  
507 (Figure 5A) for further analysis. Specifically, we tested whether the corresponding  
508 iTISs can indeed direct initiation of translation. In vitro studies, carried out using  
509 the full-length *yecJ* or *hsIR* genes, showed that in both cases addition of initiation

510 inhibitor RET or termination inhibitor Api137 caused the appearance of  
511 coincidental toeprint bands since, in these particular cases, either one of the  
512 inhibitors lead the ribosomes stalling at the initiation codon of the start-stop site  
513 (Figure 5B). These results demonstrated that the iTISs of the Start-Stops nested  
514 in the *yecJ* and *hslR* genes can direct ribosome binding. We then extended the  
515 analysis to living cells by fusing the *gfp* gene, devoid of its own start codon,  
516 immediately downstream from the AUG codon of the *yecJ* iTIS (but without its  
517 associated stop codon) (Figure 5C). When the resulting construct was expressed  
518 from a plasmid, GFP fluorescence was readily detectable as long as the initiator  
519 codon of the Start-Stop site was intact, but was significantly reduced when this  
520 AUG codon was mutated to ACG (Figure 5C). These results demonstrated that the  
521 start codon of the OOF start-stop site within the *yecJ* is operational in vivo.

522         Because the Start-stop sequence cannot generate any functional protein  
523 product, we surmised that the presence of the functional OOF start-stop within the  
524 main ORF may play a regulatory function, possibly affecting the efficiency of  
525 expression of the protein encoded in the main ORF. In order to test this hypothesis,  
526 we examined whether the presence of the functional start-stop affects the  
527 expression of the main ORF that hosts it. For that, we prepared a reporter construct  
528 where we fused *gfp* coding sequence to the segment of the *yecJ* ORF placing it  
529 downstream of start-stop but in frame with the *yecJ* pTIS (Figure 5D). Mutational  
530 analysis verified that expression of the YecJ-GFP fusion protein was directed by  
531 the *yecJ* pTIS (Figure 5D, wt vs. pTIS(-) bars). Notably, when the start codon of  
532 the OOF start-stop of *yecJ* was inactivated by mutation, the efficiency of

533 expression of the YecJ-GFP reporter increased by approximately 16% (Figure 5D,  
534 wt vs. iTIS(-) bars). These results demonstrate that the presence of the active  
535 Start-Stop site within the *yecJ* gene attenuates translation of the main ORF,  
536 indicative of the possible regulatory function of the Start-Stop.

537 Interestingly, mutating the stop codon of the *yecJ* start-stop, that should  
538 lead to translation of a 14-codon internal ORF originating at the *yecJ* iTIS,  
539 significantly reduced the expression of the YecJ-GFP reporter (the iSTOP(-)  
540 construct in Figure 5D). This result indicates that active utilization of some of the  
541 iTISs could attenuate the expression of the main ORF whereas placing stop codon  
542 immediately after the start site of the OOF iTIS could mitigate this effect.

543

#### 544 **Ribo-RET reveals TISs outside of the known annotated coding** 545 **sequences**

546 The ability of Ribo-RET to reveal the cryptic sites of translation initiation  
547 makes it a useful tool for identifying such unknown sites located not only within,  
548 but also outside of the annotated genes (Table S2). Thus, we have detected 6  
549 upstream in-frame TISs (uTISs) in the *E. coli* strain BW25113 and 36 uTISs in the  
550 BL21 strain that would result in N-terminal extensions of the encoded proteins. For  
551 one gene (*potB*), we did not observe any Ribo-RET peak at the annotated pTIS  
552 (Figure S6A), suggesting that either its start site has been mis-annotated or that  
553 the annotated pTIS is activated under growth conditions different from those used  
554 in our experiments. For several other genes (e.g. *yifN*), we were able to detect



555 Ribo-RET signals for the annotated pTIS and for the uTIS, suggesting that two  
556 protein isoforms are expressed (Figure S6B).

557 We also detected 41 common TISs outside of the annotated genes likely  
558 delineating the translation start sites of the unannotated short ORFs (Table S2).  
559 Some of the Ribo-RET-identified TISs define the start codons of the translated  
560 ORFs in the antisense transcripts relative to the annotated genes. Although  
561 analysis of such ORFs was beyond the scope of this study, which focused primarily  
562 on the unknown alternative internal translation start sites, the ability to detect such  
563 ORFs underscores the importance of Ribo-RET as a general tool for the genome-  
564 wide identification of translation start sites in bacteria.

565

## 566 **DISCUSSION**

567 We have demonstrated the utility of the Ribo-RET approach for mapping  
568 translation initiation sites in bacterial mRNAs. Genome-wide survey of such sites  
569 in two *E. coli* strains revealed translation initiation not only at the known start  
570 codons of the annotated genes, but also at over one hundred mRNA sites nested  
571 within the currently recognized ORFs. Proteins whose synthesis is initiated at such  
572 sites may constitute a previously obscure fraction of the proteome and may play  
573 important roles in cell physiology. In addition, initiation of translation at internal  
574 codons may play a regulatory role by influencing the translation efficiency of the  
575 main protein product.

576 Mapping of the cryptic translation start sites was possible due to the action  
577 of RET as a highly-specific inhibitor of translation initiation, arresting ribosomes at

578 the mRNA start codons. This finding was somewhat unexpected because binding  
579 of RET at the PTC active site would clash with the placement of formyl-methionine  
580 moiety of fMet-tRNA and by dislodging of initiator tRNA from the ribosome would  
581 prevent the start codon recognition (Gualerzi and Pon, 2015; Yan et al., 2006).  
582 However, our in vitro (toeprinting) and in vivo (Ribo-seq) data strongly argue that  
583 the RET-bound ribosome retains the P-site bound fMet-tRNA, thus allowing the  
584 antibiotic to lock the ribosome precisely at the mRNA start codons. While co-  
585 habitancy of RET and initiator fMet-tRNA in the ribosome is possible if the  
586 aminoacyl moiety of fMet-tRNA is displaced from the PTC active site, the presence  
587 of an extended nascent chain is not (Figure S1B), confining the RET inhibitory  
588 action strictly to the initiating ribosome. It is this specificity of RET action exclusively  
589 upon the initiating ribosome which makes it possible to utilize the antibiotic for  
590 confidently charting the conventional translation initiation sites at the beginning of  
591 the protein-coding sequences and also for mapping initiation-competent codons  
592 within the ORFs.

593 While RET readily inhibits the growth of Gram-positive bacteria it is less  
594 active against Gram-negative species, partly due to the active efflux of the drug  
595 from these cells (Jones et al., 2006). Therefore, in our experiments with Gram-  
596 negative *E. coli* we needed to use the strains that lacked the TolC component of  
597 the multi-drug transporters (Zgurskaya et al., 2011). This or similar 'antibiotic  
598 sensitizing' approaches could be used to apply Ribo-RET to other Gram-negative  
599 species. Even better, newer broad-spectrum, pleuromutilins, such as lefamulin,  
600 (Paukner and Riedl, 2017), could be likely used directly for mapping translation

601 initiation sites in both Gram-positive and Gram-negative bacterial species. Other  
602 antibiotics that exclusively bind to the initiating, but not elongating ribosomes, (e.g.  
603 proline-rich antimicrobial peptides (Polikanov et al., 2018)) could also be explored  
604 for their utility in mapping translation start sites in bacteria.

605 Ribo-RET revealed the presence of internal start codons in over a hundred  
606 *E. coli* genes, dramatically expanding the number of putative cases of internal  
607 initiation in bacteria of which, before our work, only a few examples were known  
608 (Meydan et al., 2018). Therefore, it appears that inner-ORF initiation of translation  
609 is a much more widespread phenomenon. Previously, lactimidomycin-assisted  
610 Ribo-seq revealed initiation of translation at inner codons of many eukaryotic ORFs  
611 (Lee et al., 2012). This effect was attributed primarily to leaky scanning resulting  
612 from the poor context of the primary start site (Lee et al., 2012). Accordingly, the  
613 secondary start sites tend to cluster close to the 5' ends of the eukaryotic ORFs.  
614 The ability of bacterial ribosomes to bind to a TIS directly, without the need to scan  
615 through the 5' UTR, makes internal initiation within bacterial genes much more  
616 versatile because the efficiency of TIS recognition should be unaffected by its  
617 position within the gene. It is likely that at least some of these iTIS could be  
618 exploited by bacteria for expanding their proteome by generating several proteins  
619 using a single coding sequence.

620 Although in most cases we have little knowledge about the possible  
621 functions of the alternative polypeptides encoded in the bacterial genes, one can  
622 envision several general scenarios:

623           1) In-frame internal initiation generates a secondary protein whose C-  
624 terminal sequence is identical to that of the primary polypeptide. Some of the N-  
625 terminally truncated isoform can represent a protein with a specific and distinct  
626 function. One such example is the ArcB-C polypeptide expressed due to an  
627 experimentally-verified internal initiation site within the *arcB* gene.

628           2) If the primary protein undergoes multimerization due to interactions  
629 mediated by its C-terminal sequence, the isoform expressed from an in-frame iTIS  
630 could partake in the complex formation. Properties of such heteromers could differ  
631 from those of the homo-complexes. Several examples of heteromers formed by  
632 the protein isoforms in bacterial species have been described previously (reviewed  
633 in (Meydan et al., 2018)). Primary proteins encoded by some of the iTIS-containing  
634 *E. coli* genes (e.g. *arcB*, *slyB*, *nudF*, *lysU* and *wzzB*) are known to form  
635 homodimers (Maddalo et al., 2011; Moreno-Bruna et al., 2001; Onesti et al., 1995;  
636 Pena-Sandoval and Georgellis, 2010; Stenberg et al., 2005) and thus, could be  
637 candidates for the formation of heteromers with their corresponding N-terminally  
638 truncated isoforms.

639           3) The activity of an in-frame 5'-proximal iTIS can generate a protein similar  
640 in functions to the primary polypeptide but differing in compartmentalization. The  
641 Ribo-RET-mapped iTISs in such genes as *speA*, *bamA*, *ivy* or *yghG* are expected  
642 to direct the production of polypeptides that lack the signal sequence of the primary  
643 protein and thus may be retained in the cytoplasm. The inner-cellular functions of  
644 some of these commonly secreted proteins remain to be investigated. Similar to  
645 bacteria, some of the iTISs identified in eukaryotic mRNAs downstream from the

646 annotated pTIS and attributed to the 'leaky scanning' could also alter the  
647 subcellular localization of the alternative polypeptides (Kochetov, 2008; Lee et al.,  
648 2012).

649 4) Because protein stability significantly depends on the nature of the N-  
650 terminal amino acid (Dougan et al., 2010), utilization of an alternative start site may  
651 generate polypeptides with varying stability that is properly tuned to the needs of  
652 the cell under specific growth conditions.

653 5) The utilization of the OOF iTISs generates polypeptides whose structure  
654 (and function) could be totally unrelated to those of the main protein product.  
655 Although simultaneous evolutionary optimization of two proteins encoded in  
656 overlapping but different reading frames is obviously difficult, such genes are found  
657 in many viruses (Pavesi et al., 2018). Furthermore, the available few examples of  
658 overlapping genes in bacteria (see (Meydan et al., 2018) for review), argue in favor  
659 of functionality of at least some of the products encoded in the alternative ORFs  
660 primed by the OOF iTISs.

661 While some of the iTISs are likely used for expanding the cellular proteome,  
662 the significance of some of the cryptic initiation sites, particularly the OOF iTISs,  
663 may lie in their regulatory role. From this standpoint, the discovery of 14 Start-  
664 Stops within the *E. coli* genes is remarkable because it is highly unlikely that the  
665 evolutionary reason for the juxtaposition of an initiator with a stop codon would be  
666 the translation of a single amino acid product. One possible function of a Start-  
667 Stop within the gene is fine-tuning the expression of the protein encoded in the  
668 host ORF. Because, in general, both initiation and termination of protein synthesis

669 are relatively slow (Li et al., 2014; Rodnina, 2018), binding of ribosomes at the  
670 start-stop site may function as a turnstile that modulates progression of the  
671 elongating ribosomes along the ORF and, as a result, impact the protein yield.  
672 However, if such mechanism takes place indeed, it is likely subtle, because we did  
673 not observe any significant change in the ribosome density before and after the  
674 start-stop site in the Ribo-seq data collected with the untreated cells during fast-  
675 growth. Another possibility for the Start-Stop retention is that the inadvertent  
676 appearance of an OOF iTIS may lead to translation of an alternative ORF that  
677 could severely interfere with the expression of the main protein. The deleterious  
678 effect of such iTIS may be mitigated by the introduction of a stop codon  
679 immediately after the start site. In agreement with this possibility, the Start-Stop  
680 within the *yecJ* gene interferes with translation of the main ORF to a much lesser  
681 extent than translation of a more extended ORF initiated at the same iTIS (Figure  
682 5D).

683 Our data indicate that Ribo-RET can be used as a reliable genome-wide  
684 tool for precise and confident mapping of the TISs in bacteria. It is conceivable,  
685 that not all of the identified iTIS directly benefit bacterial cell and a number of them  
686 could simply represent an unavoidable 'noise' of imprecise recognition of the start  
687 codons by the ribosome. It is also important to keep in mind that the appearance  
688 of a Ribo-RET peak shows only the *potential* of a codon to be used as a translation  
689 start site. By arresting the ribosomes at the primary start codons while allowing the  
690 elongating ribosomes to run off the mRNAs, RET treatment leads to the generation  
691 of ribosome-free mRNAs, thereby exposing putative iTISs for an easier recognition

692 by the remaining free ribosomes. In spite of this cautionary note, several lines of  
693 evidence make us certain that many, if not all, of the Ribo-RET-identified iTISs are  
694 recognized by the ribosomes even in the untreated cells: i) for some genes with  
695 internal initiation sites (e.g. *arcB*) an increase in ribosome density downstream of  
696 the identified iTIS can be seen in the Ribo-seq data collected with the untreated  
697 cells; ii) by using reporters or directly analyzing the protein products, we have  
698 experimentally demonstrated the functionality of iTISs in several genes (e.g. *arcB*,  
699 *sfsA*); iii) the unique tryptic peptide corresponding to the translation product of the  
700 *gndA* gene initiated at the OOF iTIS identified by Ribo-RET has been detected by  
701 shot-gun proteomics (Yuan et al., 2018); iv) Ribo-RET readily identified iTISs in  
702 three *E. coli* genes known to contain functional internal start sites (*infB*, *clpB*,  
703 *mrcB*); v) the evolutionary conservation of the mRNA structures around some of  
704 the iTISs argue in favor of their functionality.

705         Several intriguing and important questions about utilization of the alternative  
706 translation start sites remained beyond the scope of the current study. While  
707 revealing the presence of alternative translation start sites in many bacterial genes,  
708 our study has not addressed the regulatory mechanisms that control the relative  
709 utilization of pTISs and iTISs. Among other factors, the interplay of the pTIS and  
710 iTIS activity could be interesting to explore. In addition, the abundance of the  
711 proteins whose translation is initiated at an iTIS is unknown. Distinguishing the  
712 secondary product initiated at an in-frame iTIS from the main protein encoded in  
713 the full ORF would be challenging for routine shot-gun proteomics, whereas  
714 identification of the proteins resulting from the activity of the OOF iTISs requires a

715 dedicated effort, which is yet to be undertaken. More importantly, we have little  
716 knowledge of the physiological role of the alternative proteins. Even the functions  
717 of the second IF2 isoform translated from an iTIS within the *infB* gene, that has  
718 been discovered nearly half a century ago remains enigmatic (Madison et al.,  
719 2012; Miller and Wahba, 1973).

720 Besides iTISs, our Ribo-RET data reveal a number of the translation  
721 initiation sites outside of the annotated genes. Most of those sites delineate  
722 previously uncharacterized short genes encoded in the sense or even in the anti-  
723 sense transcripts, some of which have been previously described (Baek et al.,  
724 2017; Dornenburg et al., 2010; Thomason et al., 2015). Short proteins encoded in  
725 such ORFs may further expand the cryptic bacterial proteome (Storz et al., 2014),  
726 whereas translation of the other small ORFs could play regulatory roles (Ito and  
727 Chiba, 2013; Vázquez-Laslop and Mankin, 2014).

728 In conclusion, we believe that Ribo-RET presents an exceptional  
729 opportunity to map translation start sites in bacteria. Mapping the translation  
730 initiation landscape and thereby, unveiling the hidden proteome of bacteria,  
731 including the pathogenic ones, can provide us with better clues about their  
732 physiology, evolution, and virulence mechanisms.

733

#### 734 **ACKNOWLEDGEMENTS**

735 We thank the members of Mankin/Vazquez-Laslop laboratory for helpful  
736 discussions, G. Storz, J. Weaver (both, National Institutes of Health) and A.  
737 Buskirk (Johns Hopkins University) for suggestions about the manuscript, J.E.



738 Barrick (University of Texas) for providing the pRXG plasmid, D. Georgellis  
739 (National Autonomous University of Mexico for advice with some experiments, Y.  
740 Polikanov and N. Aleksashin (University of Illinois at Chicago) for help with some  
741 figures. This work was supported by the grant from the National Science  
742 Foundation MCB 1615851 (to ASM and NV-L). PVB. is supported by SFI-HRB-  
743 Wellcome Trust Biomedical Research Partnership, grant no. 210692/Z/18/Z. AEF  
744 is supported by Wellcome Trust grant no. 106207.

745

746

747

748

749 **FIGURE LEGENDS**

750 **Figure 1 RET specifically arrests ribosomes at translation initiation sites**

751 (A) Toeprinting analysis of RET- and TET-mediated ribosome stalling during cell-  
752 free translation of two model *E. coli* genes. The circles indicate TET-induced  
753 translation arrest sites, whereas triangles designate RET-mediated translational  
754 stalls. The lane labeled NONE represents samples translated in the absence of  
755 antibiotics. Sequencing lanes (C for the *atpB* gene and G for the *mgo* gene) were  
756 used to map the sites of drug-induced arrests. The nucleotide sequences of the  
757 genes and the encoded proteins are shown. Note that the toeprint bands  
758 correspond to the mRNA residue 16-17 nt downstream from the first nucleotide of  
759 the codon residing in the P site of the arrested ribosome.

760 (B) Metagene analysis plot representing normalized average relative density reads  
761 in the vicinity of the annotated start codons of the *E. coli* genes in exponentially  
762 growing cells treated with RET (black line) or not exposed to antibiotic (gray line).

763 (C) Redistribution of ribosome footprints density within the *spc* operon upon RET  
764 treatment. Top profile: no-drug sample; bottom profile: RET-treated cells.

765 See also Figures S1.

766

767 **Figure 2 Ribo-RET reveals the presence of iTISs in many bacterial genes**

768 (A) Examples of Ribo-RET profiles demonstrating the presence of well-  
769 pronounced ribosome density peaks not only at the annotated pTISs (marked with  
770 green flags) but also at internal codons of *E. coli* genes (orange flags) not known

771 previously to contain iTISs. The putative start codon of the iTIS is highlighted in  
772 orange and the SD-like sequence is underlined.

773 (B) Ribo-RET profiles of the three *E. coli* genes, *infB*, *clpB*, *mrcB*, where iTISs had  
774 been previously characterized.

775 (C) The iTISs common between the *E. coli* K-strain BW25113 and the B-strain  
776 BL21. The sector labeled as ND (not determined) represents the Ribo-RET peaks  
777 observed at internal ORF sites without any previously recognized start codon in  
778 the vicinity.

779 See also Table S1.

780

781 **Figure 3 In-frame internal initiation can generate N-terminally truncated**  
782 **products that could play physiological roles**

783 (A) The relative use of various putative start codons at the identified in-frame iTISs.

784 (B) The length of the predicted alternative proteins whose translation is initiated at  
785 the in-frame iTISs relative to the corresponding primary proteins. The previously  
786 known examples of genes with in-frame iTISs (shown in Figure 2B) are shown in  
787 orange. The genes with the iTISs located within the 3' or 5' quartile of the gene  
788 length are highlighted with yellow or blue boxes, respectively. The candidate genes  
789 where, based on TET-assisted Ribo-seq, re-annotation of their pTISs was  
790 proposed (Nakahigashi et al., 2016) are indicated by asterisks. The *arcB* and *speA*  
791 genes discussed in more detail are indicated by blue arrows.

792 (C) The Ribo-RET profile of the *arcB* gene shows a ribosomal density peak at the  
793 pTIS (green flag) and at the iTIS candidate (orange flag). The iTIS start codon is  
794 highlighted in orange and the SD-like sequence is underlined.

795 (D) Schematic representation of the full-length ArcB protein bearing its three  
796 functional domains. The putative protein product, ArcB-C, resulting from initiation  
797 of translation at the *arcB* iTIS revealed by Ribo-RET, would specifically encompass  
798 the phosphotransfer domain.

799 (E) Western blot analysis of the C-terminally 3XFLAG-tagged translation products  
800 of the *arcB* gene expressed from a plasmid in *E. coli* cells. The ArcB and ArcB-C  
801 proteins are expressed from the wild-type *arcB* (lane wt); inactivation of iTIS by the  
802 indicated mutations abrogate production of ArcB-C (lane mut). The marker protein  
803 representing the 3XFLAG ArcB-C segment of ArcB (lane M) was expressed from  
804 a specially-constructed plasmid (see STAR Methods).

805 (F) Possible role of the ArcB-C protein translated from the *arcB* iTIS. The  
806 phosphorelay across the domains of membrane-embedded ArcB (gray arrows)  
807 results in the activation of the response regulator ArcA, which then triggers the  
808 expression of genes critical for survival under low-oxygen conditions (Alvarez et  
809 al., 2016). The product of internal initiation, ArcB-C, could improve the signal  
810 amplification capabilities of the ArcBA system and, being cytosolic and detached  
811 from the membrane-bound ArcB, could activate additional response regulators  
812 (represented by a dotted oval).

813 See also Figure S2.

814

815 **Figure 4 OOF iTISs revealed by Ribo-RET can direct initiation of translation**

816 (A) The length and location of the predicted OOF alternative protein-coding  
817 segments relative to the main ORF.

818 (B) Ribo-RET profiles of *birA* and *sfsA* as representative genes with putative OOF  
819 iTISs. The pTIS and OOF iTIS start codons are shown by green and orange flags,  
820 respectively. The main frame and alternative frame stop codons are indicated by  
821 red and purple stop signs, respectively. The entire sequence of the alternative ORF  
822 is shown with the start codon highlighted in orange, stop codon highlighted in  
823 purple and putative SD-sequence underlined.

824 (C) Toeprinting analysis revealing antibiotic-induced stalling of the ribosome at the  
825 start and stop codons of the alternative ORFs within the *birA* and *sfsA* genes. RET  
826 (lanes marked RET) arrests ribosomes at the start codons of the alternative ORFs,  
827 whereas translation termination inhibitor Api137 induces translation arrest at the  
828 stop codons of those ORFs (lanes marked API). No antibiotic was present in the  
829 samples ran in lanes marked NONE. The templates used in toeprinting analysis  
830 contained the sequences of the full-length *birA* or *sfsA* genes. The nucleotide and  
831 amino acid sequences of the alternative ORFs are shown. Internal OOF start and  
832 stop codons are indicated by orange circles and purple triangles, respectively.  
833 Sequencing lanes are indicated.

834 (D) The OOF iTIS within *sfsA* initiates translation in the cell. Schematic  
835 representation of the plasmid-based reporter construct (the reference *rfp* gene is  
836 not shown). The GFP-coding sequence is OOF relative to the pTIS start codon  
837 (green flag) and its expression is controlled by the iTIS (orange flag). Mutation of

838 the iTIS AUG start codon to UCG alleviates the expression of the reporter. The  
839 first stop codon in-frame with the pTIS is shown by the red stop sign and the stop  
840 codon in-frame with the iTIS is indicated by the purple stop sign. The bar graph  
841 shows the change in relative green fluorescence in response to the iTIS start  
842 codon mutation.

843 (E) Ribo-RET snapshots of the *gnd* gene in the *E. coli* BW25113 strain (top) that  
844 reveals the location of the start codon of the alternative ORF (marked by the  
845 orange flag for the start codon and purple stop sign for the stop codon). The amino  
846 acid sequence of the alternative ORF product GndA is shown in orange. The  
847 sequence of the GndA tryptic peptide identified by mass spectrometry (Yuan et al.,  
848 2018), is indicated with bold characters. The snapshot of the *gnd* gene of the BL21  
849 strain shows the lack of the RET-generated density peak at the iTIS site,  
850 presumably due to a point mutation (red, underlined) in the SD-like region of the  
851 iTIS.

852 See also Figure S5 and Table S1.

853

#### 854 **Figure 5 Start-Stops within *E. coli* genes**

855 (A) Examples of *E. coli* genes with the Ribo-RET-revealed ribosome density at an  
856 OOF iTIS (orange flag) immediately followed by a stop codon (purple stop sign).  
857 The sequence of the minimal ORFs are shown, including the SD-like sequences  
858 preceding them. Start and stop codons of the primary ORF are indicated by green  
859 flags and red stop signs, respectively.

860 (B) Toeprinting gels showing the ribosomes stalled at the start codons of the Start-  
861 Stop sites within the *hslR* and *yecJ* genes in response to the presence of  
862 translation initiation (RET) and translation termination (API) inhibitors. The  
863 nucleotide and amino acid sequences of the minimal ORFs are shown. The Start-  
864 Stop sites are indicated by orange circles and purple triangles. NONE indicates  
865 samples that contained no antibiotic. Sequencing lanes are indicated.

866 (C) The start codon of the Start-Stop within the *yecJ* gene can direct initiation of  
867 translation in vivo. Left, schematic representation of the reporter constructs (the  
868 reference *rfp* gene is not shown) where GFP expression is directed by the start  
869 codon of the OFF iTIS (orange flag) of *yecJ*. Right, the bar graphs show the relative  
870 translation efficiency, as estimated by GFP/RFP/OD (%) ratio after 10 h induction  
871 of the reporter transcription. The expression of *gfp* is severely abrogated by a  
872 mutation that disrupts the start codon of the OOF iTIS (iTIS (-) construct).

873 (D) Translation of the Start-Stop of *yecJ* impacts expression of the host gene. Left,  
874 schematic representation of the reporter constructs where the *yecJ* pTIS (green  
875 flag) controls expression of the YecJ-GFP chimeric protein; the nucleotides  
876 encoding the C-terminal segment of YecJ downstream from the Start-Stop (orange  
877 flag and purple stop sign) were replaced with the GFP-coding sequence (placed in  
878 0-frame relative to pTIS). The main frame stop codon is shown by the red stop  
879 sign. Right, the bar graph shows sfGFP expression efficiency as estimated by  
880 GFP/RFP/OD (%) ratio 10 h after induction of the reporter transcription. Efficiency  
881 of the reporter expression increases when the start codon of the Start-Stop site is  
882 disrupted by a mutation (construct (iTIS(-)). Mutating the stop codon of the Start-

883 Stop site expands the length of the translated OOF internal coding sequence,

884 which results in severe inhibition of the main frame translation.

885 See also Figure S5 and Table S2.

886



887 **REFERENCES**

- 888 Alvarez, A.F., Barba-Ostria, C., Silva-Jimenez, H., and Georgellis, D. (2016).  
889 Organization and mode of action of two component system signaling circuits  
890 from the various kingdoms of life. *Environ. Microbiol.* *18*, 3210-3226.
- 891 Alvarez, A.F., and Georgellis, D. (2010). In vitro and in vivo analysis of the ArcB/A  
892 redox signaling pathway. *Methods Enzymol.* *471*, 205-228.
- 893 Atkins, J.F., Loughran, G., Bhatt, P.R., Firth, A.E., and Baranov, P.V. (2016).  
894 Ribosomal frameshifting and transcriptional slippage: From genetic  
895 steganography and cryptography to adventitious use. *Nucleic Acids Res.* *44*,  
896 7007-7078.
- 897 Baek, J., Lee, J., Yoon, K., and Lee, H. (2017). Identification of unannotated small  
898 genes in *Salmonella*. *G3 (Bethesda)* *7*, 983-989.
- 899 Baranov, P.V., Atkins, J.F., and Yordanova, M.M. (2015). Augmented genetic  
900 decoding: global, local and temporal alterations of decoding processes and  
901 codon meaning. *Nat. Rev. Genet.* *16*, 517-529.
- 902 Berry, I.J., Steele, J.R., Padula, M.P., and Djordjevic, S.P. (2016). The application  
903 of terminomics for the identification of protein start sites and proteoforms in  
904 bacteria. *Proteomics* *16*, 257-272.
- 905 Bienvenut, W.V., Giglione, C., and Meinel, T. (2015). Proteome-wide analysis of  
906 the amino terminal status of *Escherichia coli* proteins at the steady-state and  
907 upon deformylation inhibition. *Proteomics* *15*, 2503-2518.
- 908 Birch, A., Hausler, A., Ruttener, C., and Hutter, R. (1991). Chromosomal deletion  
909 and rearrangement in *Streptomyces glaucescens*. *J. Bacteriol.* *173*, 3531-  
910 3538.
- 911 Blanchard, S.C., Gonzalez, R.L., Kim, H.D., Chu, S., and Puglisi, J.D. (2004). tRNA  
912 selection and kinetic proofreading in translation. *Nat. Struct. Mol. Biol.* *11*,  
913 1008-1014.
- 914 Brandi, L., Marzi, S., Fabbretti, A., Fleischer, C., Hill, W.E., Gualerzi, C.O., and  
915 Stephen Lodmell, J. (2004). The translation initiation functions of IF2: targets  
916 for thiostrepton inhibition. *J. Mol. Biol.* *335*, 881-894.
- 917 Brodersen, D.E., Clemons, W.M., Jr., Carter, A.P., Morgan-Warren, R.J.,  
918 Wimberly, B.T., and Ramakrishnan, V. (2000). The structural basis for the  
919 action of the antibiotics tetracycline, pactamycin, and hygromycin B on the 30S  
920 ribosomal subunit. *Cell* *103*, 1143-1154.
- 921 Broome-Smith, J.K., Edelman, A., Yousif, S., and Spratt, B.G. (1985). The  
922 nucleotide sequences of the *ponA* and *ponB* genes encoding penicillin-binding  
923 protein 1A and 1B of *Escherichia coli* K12. *Eur. J. Biochem.* *147*, 437-446.
- 924 Buch, J.K., and Boyle, S.M. (1985). Biosynthetic arginine decarboxylase in  
925 *Escherichia coli* is synthesized as a precursor and located in the cell envelope.  
926 *J. Bacteriol.* *163*, 522-527.
- 927 Cameron, D.M., Thompson, J., March, P.E., and Dahlberg, A.E. (2002). Initiation  
928 factor IF2, thiostrepton and micrococin prevent the binding of elongation factor  
929 G to the *Escherichia coli* ribosome. *J. Mol. Biol.* *319*, 27-35.

- 930 Chengguang, H., Sabatini, P., Brandi, L., Giuliodori, A.M., Pon, C.L., and Gualerzi,  
931 C.O. (2017). Ribosomal selection of mRNAs with degenerate initiation triplets.  
932 *Nucleic Acids Res.* *45*, 7309-7325.
- 933 Cundliffe, E. (1981). Antibiotic Inhibitors of Ribosome Function. In *The Molecular*  
934 *Basis of Antibiotic Action*, E.F. Gale, E. Cundliffe, P.E. Reynolds, M.H.  
935 Richmond, and M.J. Waring, eds. (London, New York, Sydney, Toronto: John  
936 Willey & Sons), pp. 402-545.
- 937 D'Souza, C., Nakano, M.M., and Zuber, P. (1994). Identification of *comS*, a gene  
938 of the *srfA* operon that regulates the establishment of genetic competence in  
939 *Bacillus subtilis*. *Proc. Natl. Acad. Sci. U. S. A.* *91*, 9397-9401.
- 940 Davidovich, C., Bashan, A., Auerbach-Nevo, T., Yaggie, R.D., Gontarek, R.R., and  
941 Yonath, A. (2007). Induced-fit tightens pleuromutilins binding to ribosomes and  
942 remote interactions enable their selectivity. *Proc. Natl. Acad. Sci. U. S. A.* *104*,  
943 4291-4296.
- 944 Dornenburg, J.E., Devita, A.M., Palumbo, M.J., and Wade, J.T. (2010).  
945 Widespread antisense transcription in *Escherichia coli*. *MBio* *1*, e00024-10
- 946 Dornhelm, P., and Hogenauer, G. (1978). The effects of tiamulin, a semisynthetic  
947 pleuromutilin derivative, on bacterial polypeptide chain initiation. *Eur. J.*  
948 *Biochem.* *91*, 465-473.
- 949 Dougan, D.A., Truscott, K.N., and Zeth, K. (2010). The bacterial N-end rule  
950 pathway: expect the unexpected. *Mol. Microbiol.* *76*, 545-558.
- 951 Eisenberg, M.A., Prakash, O., and Hsiung, S.C. (1982). Purification and properties  
952 of the biotin repressor. A bifunctional protein. *J. Biol. Chem.* *257*, 15167-15173.
- 953 Espah Borujeni, A., Channarasappa, A.S., and Salis, H.M. (2014). Translation rate  
954 is controlled by coupled trade-offs between site accessibility, selective RNA  
955 unfolding and sliding at upstream standby sites. *Nucleic Acids Res.* *42*, 2646-  
956 2659.
- 957 Feltens, R., Gossringer, M., Willkomm, D.K., Urlaub, H., and Hartmann, R.K.  
958 (2003a). An unusual mechanism of bacterial gene expression revealed for the  
959 RNase P protein of *Thermus* strains. *Proc. Natl. Acad. Sci. U. S. A.* *100*, 5724-  
960 5729.
- 961 Florin, T., Maracci, C., Graf, M., Karki, P., Klepacki, D., Berninghausen, O.,  
962 Beckmann, R., Vazquez-Laslop, N., Wilson, D.N., Rodnina, M.V., Mankin, A.  
963 S. (2017). An antimicrobial peptide that inhibits translation by trapping release  
964 factors on the ribosome. *Nat. Struct. Mol. Biol.* *24*, 752-757.
- 965 Fritsch, C., Herrmann, A., Nothnagel, M., Szafranski, K., Huse, K., Schumann, F.,  
966 Schreiber, S., Platzer, M., Krawczak, M., Hampe, J., Brosch, M. (2012).  
967 Genome-wide search for novel human uORFs and N-terminal protein  
968 extensions using ribosomal footprinting. *Genome Res.* *22*, 2208-2218.
- 969 Gao, T., Yang, Z., Wang, Y., and Jing, L. (2010). Identifying translation initiation  
970 sites in prokaryotes using support vector machine. *J. Theor. Biol.* *262*, 644-649.
- 971 Gao, X., Wan, J., Liu, B., Ma, M., Shen, B., and Qian, S.B. (2015). Quantitative  
972 profiling of initiating ribosomes in vivo. *Nat. Methods* *12*, 147-153.
- 973 Giess, A., Jonckheere, V., Ndah, E., Chyzynska, K., Van Damme, P., and Valen,  
974 E. (2017). Ribosome signatures aid bacterial translation initiation site  
975 identification. *BMC Biol.* *15*, 76.

- 976 Grenier, F., Matteau, D., Baby, V., and Rodrigue, S. (2014). Complete Genome  
977 Sequence of *Escherichia coli* BW25113. *Genome Announc.* 2, e01038-14.  
978
- 979 Gualerzi, C.O., and Pon, C.L. (2015). Initiation of mRNA translation in bacteria:  
980 structural and dynamic aspects. *Cell Mol. Life Sci.* 72, 4341-4367.
- 981 Guerrero, M.D., and Modolell, J. (1980). Hygromycin A, a novel inhibitor of  
982 ribosomal peptidyltransferase. *Eur. J. Biochem.* 107, 409-414.
- 983 Hamoen, L.W., Eshuis, H., Jongbloed, J., Venema, G., and van Sinderen, D.  
984 (1995). A small gene, designated *comS*, located within the coding region of the  
985 fourth amino acid-activation domain of *srfA*, is required for competence  
986 development in *Bacillus subtilis*. *Mol Microbiol* 15, 55-63.
- 987 Hartz, D., McPheeters, D.S., Traut, R., and Gold, L. (1988). Extension inhibition  
988 analysis of translation initiation complexes. *Methods Enzymol.* 164, 419-425.
- 989 Hecht, A., Glasgow, J., Jaschke, P.R., Bawazer, L.A., Munson, M.S., Cochran,  
990 J.R., Endy, D., and Salit, M. (2017). Measurements of translation initiation from  
991 all 64 codons in *E. coli*. *Nucleic Acids Res.* 45, 3615-3626.
- 992 Impens, F., Rolhion, N., Radoshevich, L., Becavin, C., Duval, M., Mellin, J., Garcia  
993 Del Portillo, F., Pucciarelli, M.G., Williams, A.H., and Cossart, P. (2017). N-  
994 terminomics identifies Prli42 as a membrane miniprotein conserved in  
995 Firmicutes and critical for stressosome activation in *Listeria monocytogenes*.  
996 *Nat. Microbiol.* 2, 17005.
- 997 Ingolia, N.T., Ghaemmaghami, S., Newman, J.R., and Weissman, J.S. (2009).  
998 Genome-wide analysis in vivo of translation with nucleotide resolution using  
999 ribosome profiling. *Science* 324, 218-223.
- 1000 Ingolia, N.T., Lareau, L.F., and Weissman, J.S. (2011). Ribosome profiling of  
1001 mouse embryonic stem cells reveals the complexity and dynamics of  
1002 mammalian proteomes. *Cell* 147, 789-802.
- 1003 Ito, K., and Chiba, S. (2013). Arrest peptides: cis-acting modulators of translation.  
1004 *Annu. Rev. Biochem.* 82, 171-202.
- 1005 Jones, R.N., Fritsche, T.R., Sader, H.S., and Ross, J.E. (2006). Activity of  
1006 retapamulin (SB-275833), a novel pleuromutilin, against selected resistant  
1007 gram-positive cocci. *Antimicrob. Agents Chemother.* 50, 2583-2586.
- 1008 Kannan, K., Kanabar, P., Schryer, D., Florin, T., Oh, E., Bahroos, N., Tenson, T.,  
1009 Weissman, J.S., and Mankin, A.S. (2014). The general mode of translation  
1010 inhibition by macrolide antibiotics. *Proc. Natl. Acad. Sci. U. S. A.* 111, 15958-  
1011 15963.
- 1012 Kawamukai, M., Utsumi, R., Takeda, K., Higashi, A., Matsuda, H., Choi, Y.L., and  
1013 Komano, T. (1991). Nucleotide sequence and characterization of the *sfs1* gene:  
1014 *sfs1* is involved in CRP\*-dependent mal gene expression in *Escherichia coli*. *J.*  
1015 *Bacteriol.* 173, 2644-2648.
- 1016 Kingston, A.W., Ponkratz, C., and Raleigh, E.A. (2017). Rpn (YhgA-Like) Proteins  
1017 of *Escherichia coli* K-12 and Their Contribution to RecA-Independent  
1018 Horizontal Transfer. *J. Bacteriol.* 199, e00787-16
- 1019 Kochetov, A.V. (2008). Alternative translation start sites and hidden coding  
1020 potential of eukaryotic mRNAs. *Bioessays* 30, 683-691.

- 1021 Koressaar, T., and Remm, M. (2012). Characterization of species-specific repeats  
1022 in 613 prokaryotic species. *DNA Res.* *19*, 219-230.
- 1023 Kozak, M. (2005). Regulation of translation via mRNA structure in prokaryotes and  
1024 eukaryotes. *Gene* *361*, 13-37.
- 1025 Krummheuer, J., Johnson, A.T., Hauber, I., Kammler, S., Anderson, J.L., Hauber,  
1026 J., Purcell, D.F., and Schaal, H. (2007). A minimal uORF within the HIV-1 vpu  
1027 leader allows efficient translation initiation at the downstream env AUG.  
1028 *Virology* *363*, 261-271.
- 1029 Lee, S., Liu, B., Lee, S., Huang, S.X., Shen, B., and Qian, S.B. (2012). Global  
1030 mapping of translation initiation sites in mammalian cells at single-nucleotide  
1031 resolution. *Proc. Natl. Acad. Sci. U. S. A.* *109*, E2424-2432.
- 1032 Li, G.W., Burkhardt, D., Gross, C., and Weissman, J.S. (2014). Quantifying  
1033 absolute protein synthesis rates reveals principles underlying allocation of  
1034 cellular resources. *Cell* *157*, 624-635.
- 1035 Maddalo, G., Stenberg-Bruzell, F., Gotzke, H., Toddo, S., Bjorkholm, P., Eriksson,  
1036 H., Chovanec, P., Genevaux, P., Lehtio, J., Ilag, L.L., Daley, D. O. (2011).  
1037 Systematic analysis of native membrane protein complexes in *Escherichia coli*.  
1038 *J. Proteome Res.* *10*, 1848-1859.
- 1039 Madison, K.E., Abdelmeguid, M.R., Jones-Foster, E.N., and Nakai, H. (2012). A  
1040 new role for translation initiation factor 2 in maintaining genome integrity. *PLoS*  
1041 *Genet* *8*, e1002648.
- 1042 Makita, Y., de Hoon, M.J., and Danchin, A. (2007). Hon-yaku: a biology-driven  
1043 Bayesian methodology for identifying translation initiation sites in prokaryotes.  
1044 *BMC Bioinformatics* *8*, 47.
- 1045 Marks, J., Kannan, K., Roncase, E.J., Klepacki, D., Kefi, A., Orelle, C., Vazquez-  
1046 Laslop, N., and Mankin, A.S. (2016). Context-specific inhibition of translation  
1047 by ribosomal antibiotics targeting the peptidyl transferase center. *Proc. Natl.*  
1048 *Acad. Sci. U. S. A.* *113*, 12150-12155.
- 1049 Meydan, S., Vazquez-Laslop, N., and Mankin, A.S. (2018). Genes within genes in  
1050 bacterial genomes. *Microbiol Spectr* *6*.
- 1051 Michael, A.J. (2016). Biosynthesis of polyamines and polyamine-containing  
1052 molecules. *Biochem. J.* *473*, 2315-2329.
- 1053 Miller, M.J., and Wahba, A.J. (1973). Chain initiation factor 2. Purification and  
1054 properties of two species from *Escherichia coli* MRE 600. *J. Biol. Chem.* *248*,  
1055 1084-1090.
- 1056 Moll, I., Grill, S., Gualerzi, C.O., and Blasi, U. (2002). Leaderless mRNAs in  
1057 bacteria: surprises in ribosomal recruitment and translational control. *Mol.*  
1058 *Microbiol.* *43*, 239-246.
- 1059 Moreno-Bruna, B., Baroja-Fernandez, E., Munoz, F.J., Bastarrica-Berasategui, A.,  
1060 Zanduetta-Criado, A., Rodriguez-Lopez, M., Lasa, I., Akazawa, T., and  
1061 Pozueta-Romero, J. (2001). Adenosine diphosphate sugar pyrophosphatase  
1062 prevents glycogen biosynthesis in *Escherichia coli*. *Proc. Natl. Acad. Sci. U. S.*  
1063 *A.* *98*, 8128-8132.
- 1064 Nakahigashi, K., Takai, Y., Kimura, M., Abe, N., Nakayashiki, T., Shiwa, Y.,  
1065 Yoshikawa, H., Wanner, B.L., Ishihama, Y., and Mori, H. (2016).

- 1066       Comprehensive identification of translation start sites by tetracycline-inhibited  
1067       ribosome profiling. *DNA Res.* 23, 193-201.
- 1068       Nakatogawa, H., and Ito, K. (2002). The ribosomal exit tunnel functions as a  
1069       discriminating gate. *Cell* 108, 629-636.
- 1070       Nyengaard, N.R., Mortensen, K.K., Lassen, S.F., Hershey, J.W., and Sperling-  
1071       Petersen, H.U. (1991). Tandem translation of *E. coli* initiation factor IF2 beta:  
1072       purification and characterization in vitro of two active forms. *Biochem. Biophys.*  
1073       *Res. Commun.* 181, 1572-1579.
- 1074       Onesti, S., Miller, A.D., and Brick, P. (1995). The crystal structure of the lysyl-tRNA  
1075       synthetase (LysU) from *Escherichia coli*. *Structure* 3, 163-176.
- 1076       Orelle, C., Carlson, S., Kaushal, B., Almutairi, M.M., Liu, H., Ochabowicz, A.,  
1077       Quan, S., Pham, V.C., Squires, C.L., Murphy, B.T., Mankin, A. S. (2013). Tools  
1078       for characterizing bacterial protein synthesis inhibitors. *Antimicrob. Agents*  
1079       *Chemother.* 57, 5994-6004.
- 1080       Osterman, I.A., Evfratov, S.A., Sergiev, P.V., and Dontsova, O.A. (2013).  
1081       Comparison of mRNA features affecting translation initiation and reinitiation.  
1082       *Nucleic Acids Res.* 41, 474-486.
- 1083       Park, S.K., Kim, K.I., Woo, K.M., Seol, J.H., Tanaka, K., Ichihara, A., Ha, D.B., and  
1084       Chung, C.H. (1993). Site-directed mutagenesis of the dual translational  
1085       initiation sites of the *clpB* gene of *Escherichia coli* and characterization of its  
1086       gene products. *J. Biol. Chem.* 268, 20170-20174.
- 1087       Paukner, S., and Riedl, R. (2017). Pleuromutilins: potent drugs for resistant bugs-  
1088       mode of action and resistance. *Cold Spring Harb. Perspect. Med.* 7, a027110.
- 1089       Pavesi, A., Vianelli, A., Chirico, N., Bao, Y., Blinkova, O., Belshaw, R., Firth, A.,  
1090       and Karlin, D. (2018). Overlapping genes and the proteins they encode differ  
1091       significantly in their sequence composition from non-overlapping genes. *PLoS*  
1092       *One* 13, e0202513.
- 1093       Peña-Sandoval, G.R., and Georgellis, D. (2010). The ArcB sensor kinase of  
1094       *Escherichia coli* autophosphorylates by an intramolecular reaction. *J. Bacteriol.*  
1095       192, 1735-1739.
- 1096       Pioletti, M., Schlunzen, F., Harms, J., Zarivach, R., Gluhmann, M., Avila, H.,  
1097       Bashan, A., Bartels, H., Auerbach, T., Jacobi, C., Hartsch, T., Yonath, A.,  
1098       Franceschi, F. (2001). Crystal structures of complexes of the small ribosomal  
1099       subunit with tetracycline, edeine and IF3. *EMBO J.* 20, 1829-1839.
- 1100       Plumbridge, J.A., Deville, F., Sacerdot, C., Petersen, H.U., Cenatiempo, Y.,  
1101       Cozzone, A., Grunberg-Manago, M., and Hershey, J.W. (1985). Two  
1102       translational initiation sites in the *infB* gene are used to express initiation factor  
1103       IF2 alpha and IF2 beta in *Escherichia coli*. *EMBO J.* 4, 223-229.
- 1104       Polikanov, Y.S., Aleksashin, N.A., Beckert, B., and Wilson, D.N. (2018). The  
1105       mechanisms of action of ribosome-targeting peptide antibiotics. *Front. Mol.*  
1106       *Biosci.* 5, 48.
- 1107       Polikanov, Y.S., Starosta, A.L., Juetter, M.F., Altman, R.B., Terry, D.S., Lu, W.,  
1108       Burnett, B.J., Dinos, G., Reynolds, K.A., Blanchard, S.C., Steitz, T. A., Wilson,  
1109       D. N. (2015). Distinct tRNA accommodation intermediates observed on the  
1110       ribosome with the antibiotics hygromycin A and A201A. *Mol. Cell* 58, 832-844.

- 1111 Poulsen, S.M., Karlsson, M., Johansson, L.B., and Vester, B. (2001). The  
1112 pleuromutilin drugs tiamulin and valnemulin bind to the RNA at the peptidyl  
1113 transferase centre on the ribosome. *Mol. Microbiol.* *41*, 1091-1099.
- 1114 Rodnina, M.V. (2018). Translation in Prokaryotes. Cold Spring Harb. Perspect.  
1115 Biol. doi: 10.1101/cshperspect.a032664
- 1116
- 1117 Sacerdot, C., Vachon, G., Laalami, S., Morel-Deville, F., Cenatiempo, Y., and  
1118 Grunberg-Manago, M. (1992). Both forms of translational initiation factor IF2  
1119 (alpha and beta) are required for maximal growth of *Escherichia coli*. Evidence  
1120 for two translational initiation codons for IF2 beta. *J. Mol. Biol.* *225*, 67-80.
- 1121 Salmon, K.A., Hung, S.P., Steffen, N.R., Krupp, R., Baldi, P., Hatfield, G.W., and  
1122 Gunsalus, R.P. (2005). Global gene expression profiling in *Escherichia coli*  
1123 K12: effects of oxygen availability and ArcA. *J. Biol. Chem.* *280*, 15084-15096.
- 1124 Salzberg, S.L., Delcher, A.L., Kasif, S., and White, O. (1998). Microbial gene  
1125 identification using interpolated Markov models. *Nucleic Acids Res.* *26*, 544-  
1126 548.
- 1127 Schlunzen, F., Pyetan, E., Fucini, P., Yonath, A., and Harms, J.M. (2004).  
1128 Inhibition of peptide bond formation by pleuromutilins: the structure of the 50S  
1129 ribosomal subunit from *Deinococcus radiodurans* in complex with tiamulin. *Mol.*  
1130 *Microbiol.* *54*, 1287-1294.
- 1131 Shimizu, Y., Inoue, A., Tomari, Y., Suzuki, T., Yokogawa, T., Nishikawa, K., and  
1132 Ueda, T. (2001). Cell-free translation reconstituted with purified components.  
1133 *Nat. Biotechnol.* *19*, 751-755.
- 1134 Shine, J., and Dalgarno, L. (1975). Determinant of cistron specificity in bacterial  
1135 ribosomes. *Nature* *254*, 34-38.
- 1136 Stegmeier, J.F., and Andersen, C. (2006). Characterization of pores formed by  
1137 YaeT (Omp85) from *Escherichia coli*. *J. Biochem.* *140*, 275-283.
- 1138 Stenberg, F., Chovanec, P., Maslen, S.L., Robinson, C.V., Ilag, L.L., von Heijne,  
1139 G., and Daley, D.O. (2005). Protein complexes of the *Escherichia coli* cell  
1140 envelope. *J. Biol. Chem.* *280*, 34409-34419.
- 1141 Storz, G., Wolf, Y.I., and Ramamurthi, K.S. (2014). Small proteins can no longer  
1142 be ignored. *Annual Review Biochem.* *83*, 753-777.
- 1143 Strozen, T.G., Li, G., and Howard, S.P. (2012). YghG (GspSbeta) is a novel pilot  
1144 protein required for localization of the GspSbeta type II secretion system  
1145 secretin of enterotoxigenic *Escherichia coli*. *Infect. Immun.* *80*, 2608-2622.
- 1146 Studier, F.W., Daegelen, P., Lenski, R.E., Maslov, S., and Kim, J.F. (2009).  
1147 Understanding the differences between genome sequences of *Escherichia coli*  
1148 B strains REL606 and BL21(DE3) and comparison of the *E. coli* B and K-12  
1149 genomes. *J. Mol. Biol.* *394*, 653-680.
- 1150 Tanaka, M., Sotta, N., Yamazumi, Y., Yamashita, Y., Miwa, K., Murota, K., Chiba,  
1151 Y., Hirai, M.Y., Akiyama, T., Onouchi, H., Naito, S., Fujiwara, T. (2016). The  
1152 Minimum Open Reading Frame, AUG-Stop, Induces Boron-Dependent  
1153 Ribosome Stalling and mRNA Degradation. *Plant Cell* *28*, 2830-2849.
- 1154 Thomason, M.K., Bischler, T., Eisenbart, S.K., Forstner, K.U., Zhang, A., Herbig,  
1155 A., Nieselt, K., Sharma, C.M., and Storz, G. (2015). Global transcriptional start

- 1156 site mapping using differential RNA sequencing reveals novel antisense RNAs  
1157 in *Escherichia coli*. *J. Bacteriol.* *197*, 18-28.
- 1158 Vázquez-Laslop, N., and Mankin, A.S. (2014). Triggering peptide-dependent  
1159 translation arrest by small molecules: ribosome stalling modulated by  
1160 antibiotics. In *Regulatory Nascent Polypeptides*, K. Ito, ed. (New York:  
1161 Springer), pp. 165-186.
- 1162 Villegas, A., and Kropinski, A.M. (2008). An analysis of initiation codon utilization  
1163 in the Domain Bacteria - concerns about the quality of bacterial genome  
1164 annotation. *Microbiology* *154*, 2559-2661.
- 1165 Vimberg, V., Tats, A., Remm, M., and Tenson, T. (2007). Translation initiation  
1166 region sequence preferences in *Escherichia coli*. *BMC Mol. Biol.* *8*, 100.
- 1167 Wasinger, V.C., and Humphery-Smith, I. (1998). Small genes/gene-products in  
1168 *Escherichia coli* K-12. *FEMS Microbiol. Lett.* *169*, 375-382.
- 1169 Wilson, D.N. (2009). The A-Z of bacterial translation inhibitors. *Crit. Rev. Biochem.*  
1170 *Mol. Biol.* *44*, 393-433.
- 1171 Woolstenhulme, C.J., Gydosh, N.R., Green, R., and Buskirk, A.R. (2015). High-  
1172 precision analysis of translational pausing by ribosome profiling in bacteria  
1173 lacking EFP. *Cell Rep.* *11*, 13-21.
- 1174 Wu, W.H., and Morris, D.R. (1973). Biosynthetic arginine decarboxylase from  
1175 *Escherichia coli*. Purification and properties. *J. Biol. Chem.* *248*, 1687-1695.
- 1176 Yaku, H., Kato, M., Hakoshima, T., Tsuzuki, M., and Mizuno, T. (1997). Interaction  
1177 between the CheY response regulator and the histidine-containing  
1178 phosphotransfer (HPT) domain of the ArcB sensory kinase in *Escherichia coli*.  
1179 *FEBS Lett.* *408*, 337-340.
- 1180 Yan, K., Madden, L., Choudhry, A.E., Voigt, C.S., Copeland, R.A., and Gontarek,  
1181 R.R. (2006). Biochemical characterization of the interactions of the novel  
1182 pleuromutilin derivative retapamulin with bacterial ribosomes. *Antimicrob.*  
1183 *Agents Chemother.* *50*, 3875-3881.
- 1184 Yuan, P., D'Lima, N.G., and Slavoff, S.A. (2018). Comparative membrane  
1185 proteomics reveals a nonannotated *E. coli* heat shock protein. *Biochemistry* *57*,  
1186 56-60.
- 1187 Zgurskaya, H.I., Krishnamoorthy, G., Ntrel, A., and Lu, S. (2011). Mechanism and  
1188 function of the outer membrane channel TolC in multidrug resistance and  
1189 physiology of Enterobacteria. *Front. Microbiol.* *2*, 189.
- 1190  
1191

Figure 1

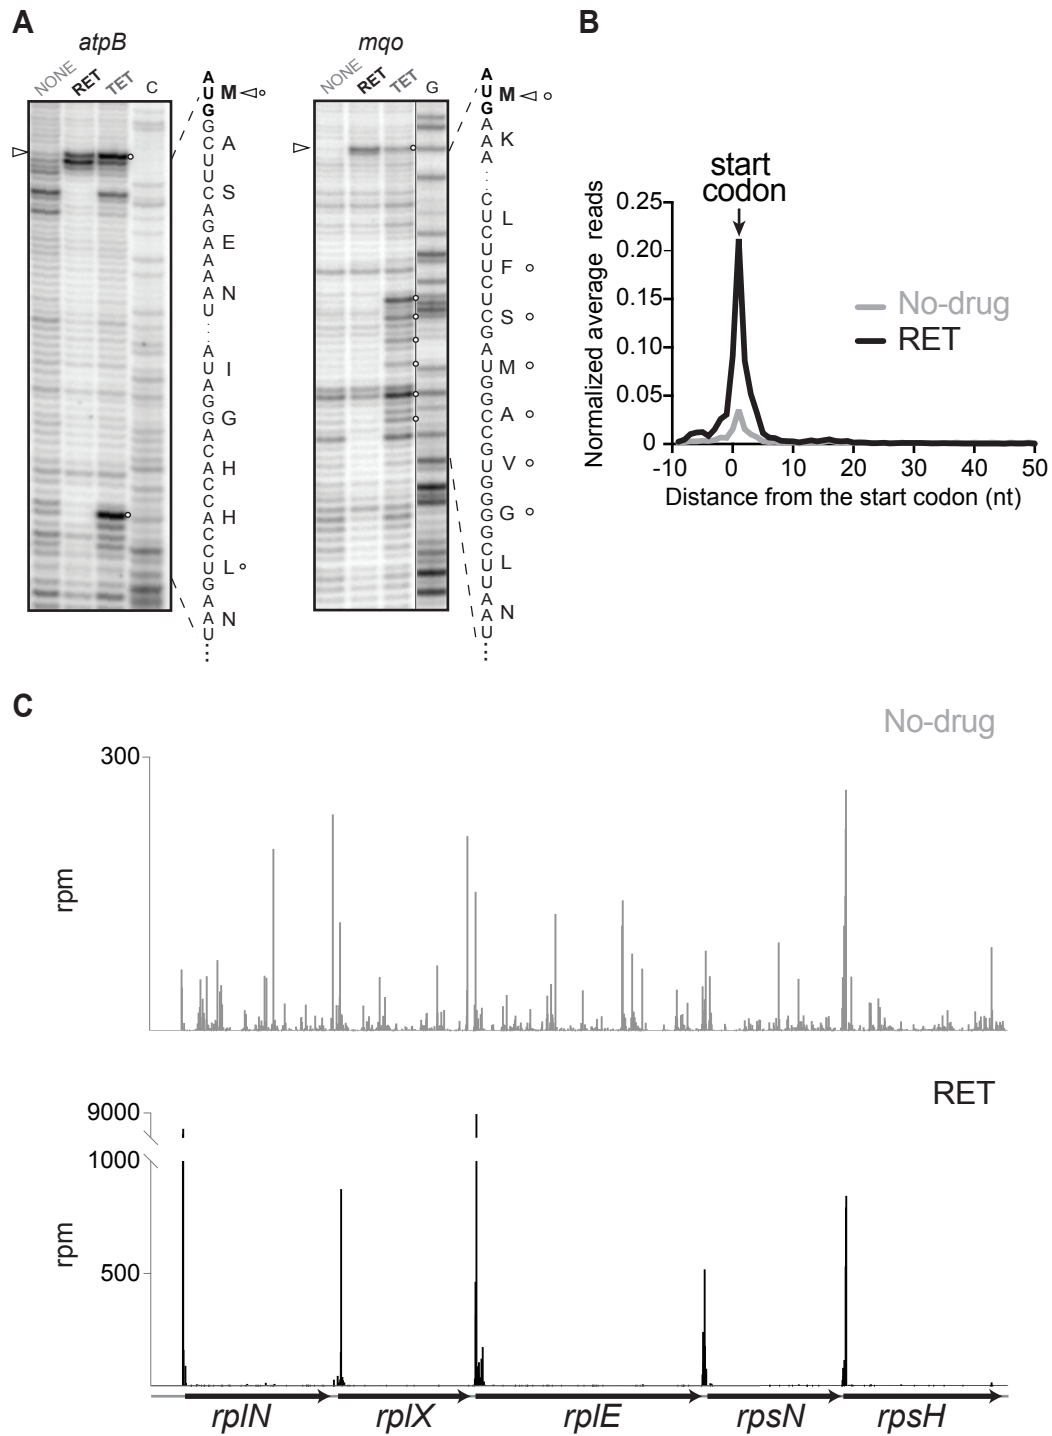



Figure 2

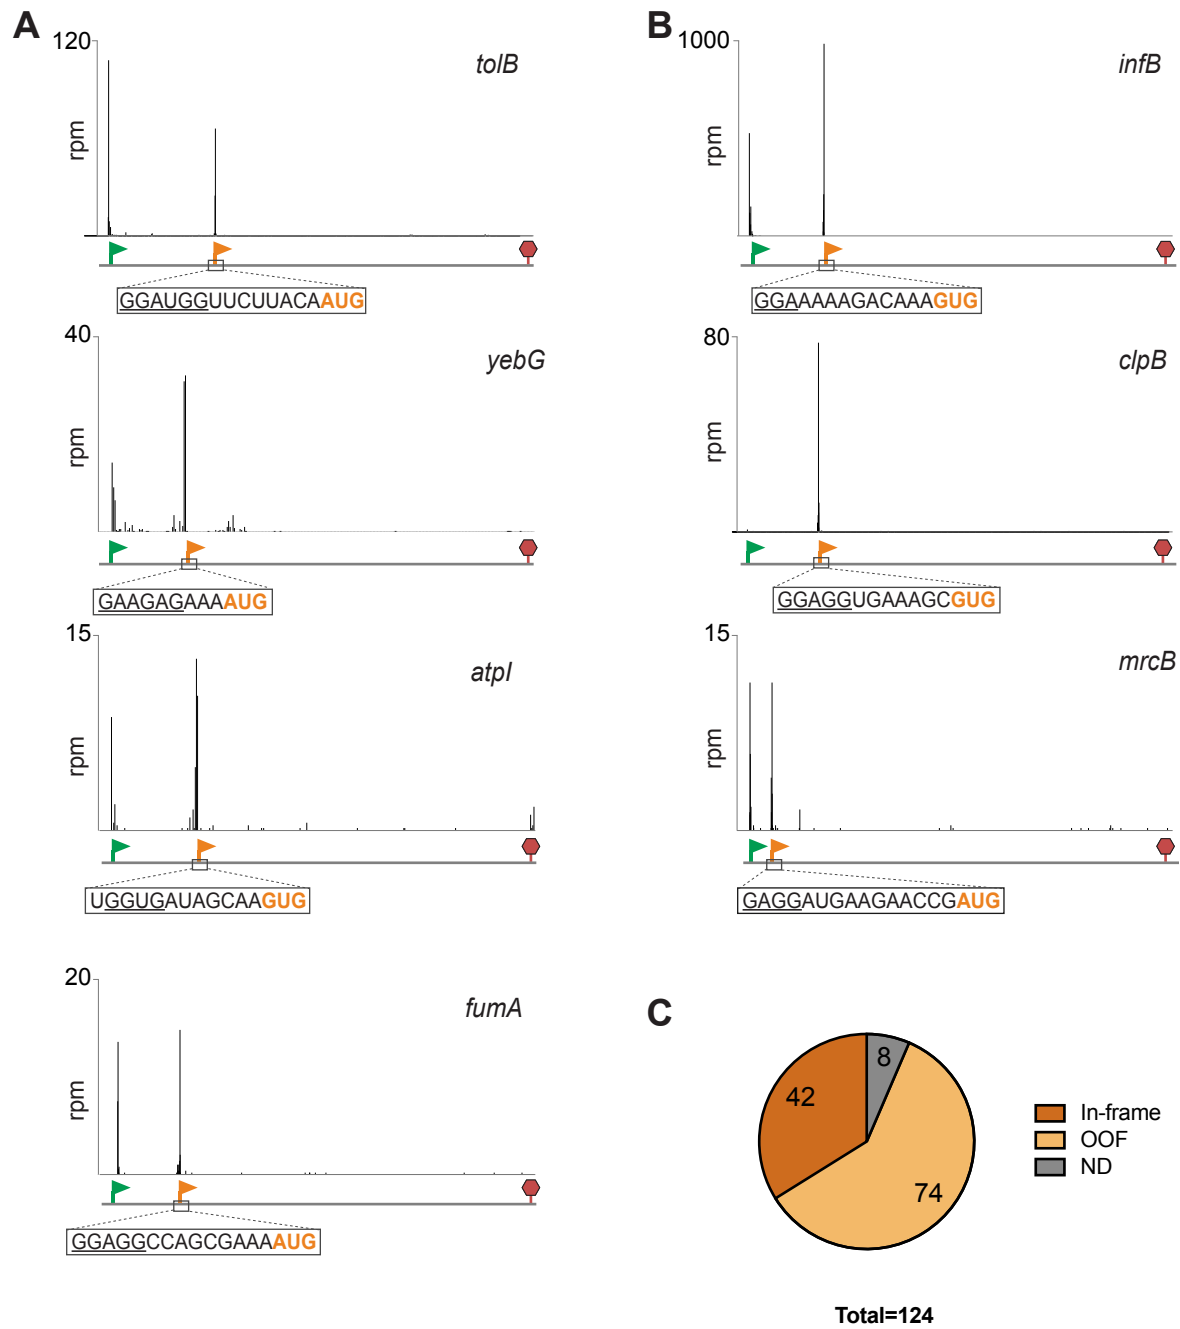

Figure 3

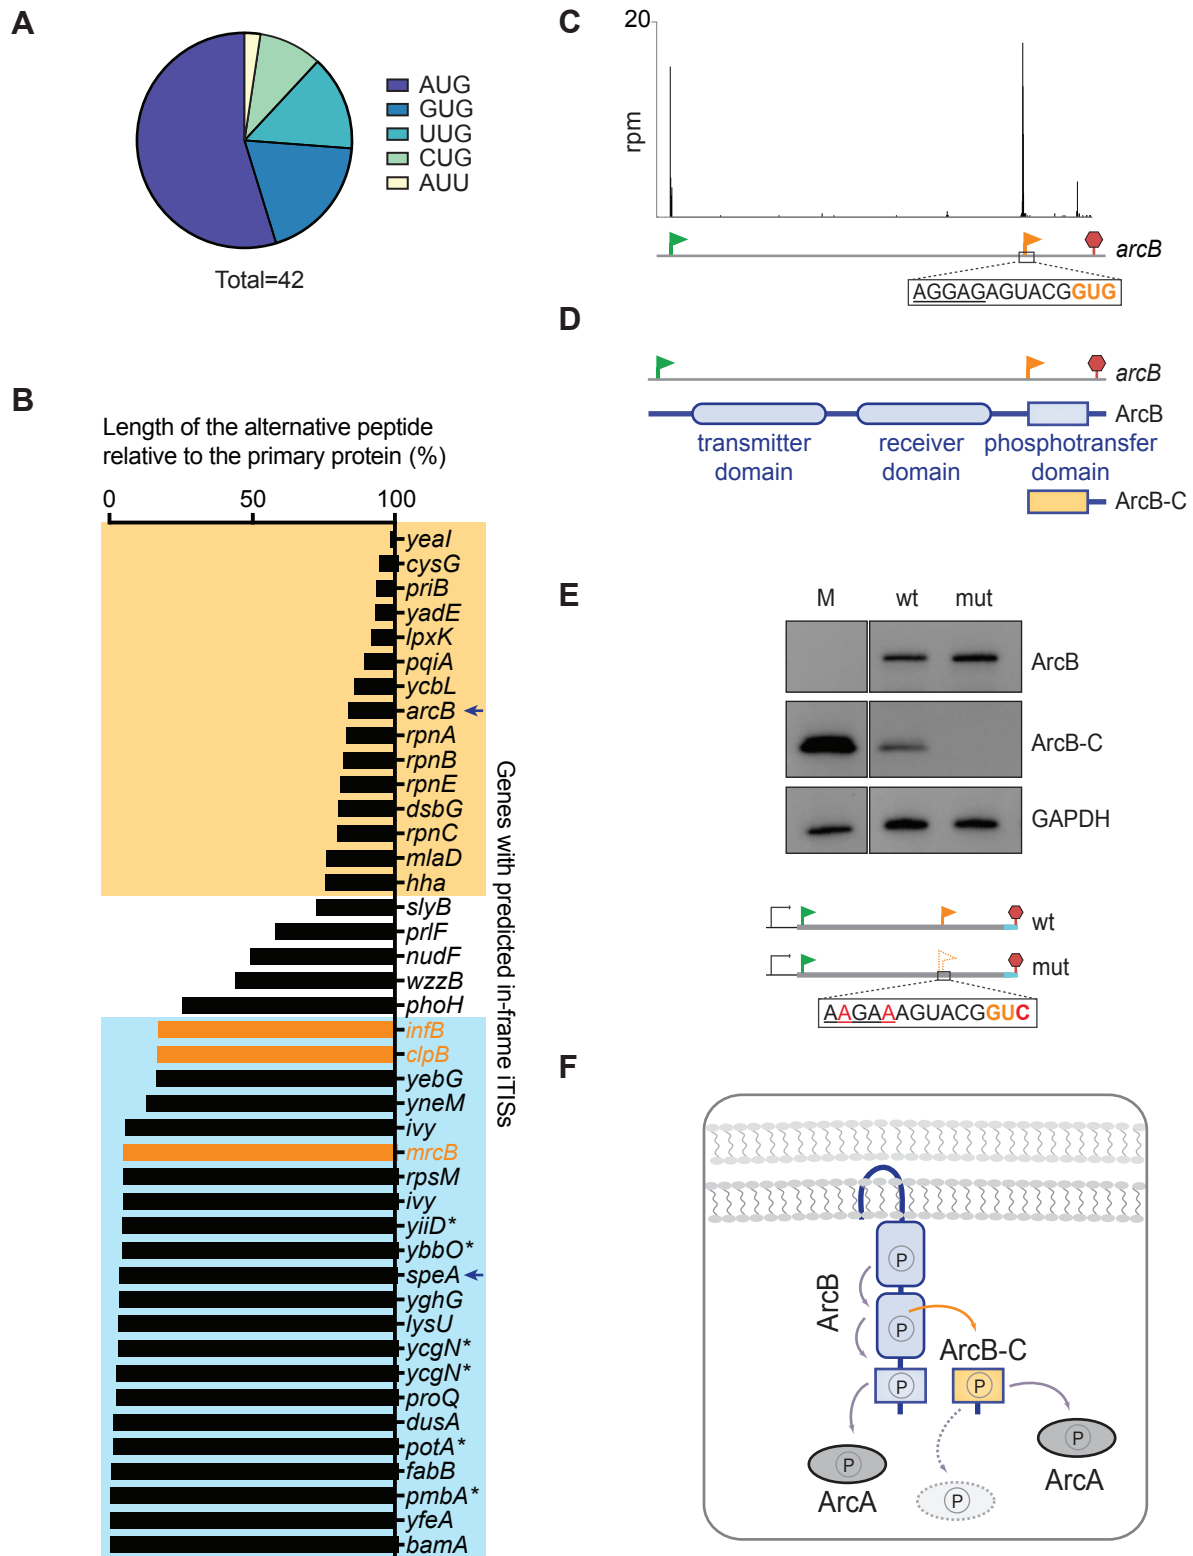

Figure 4

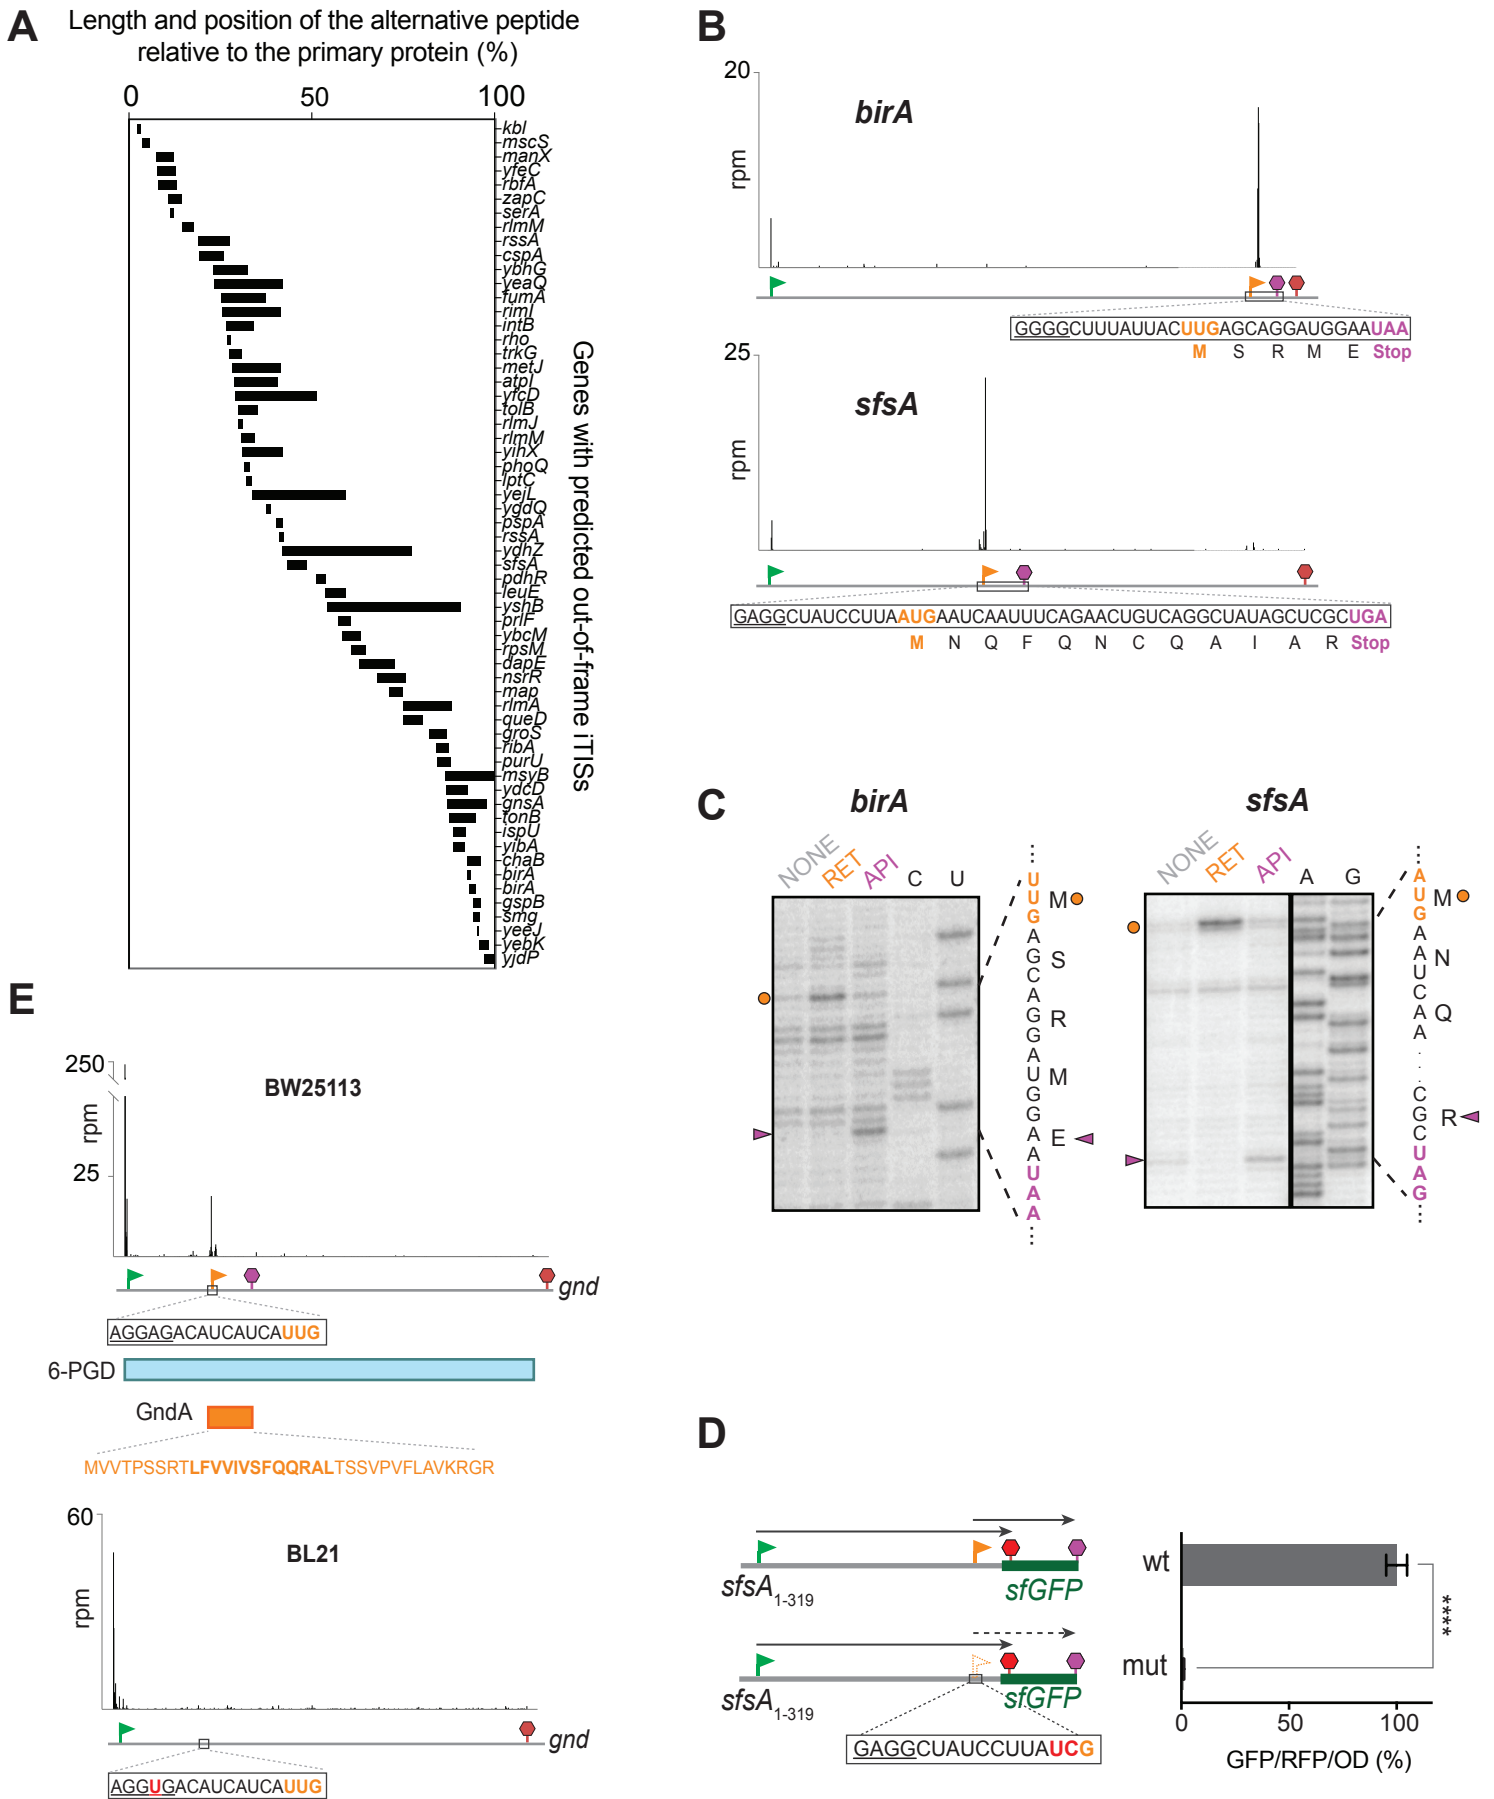

Figure 5

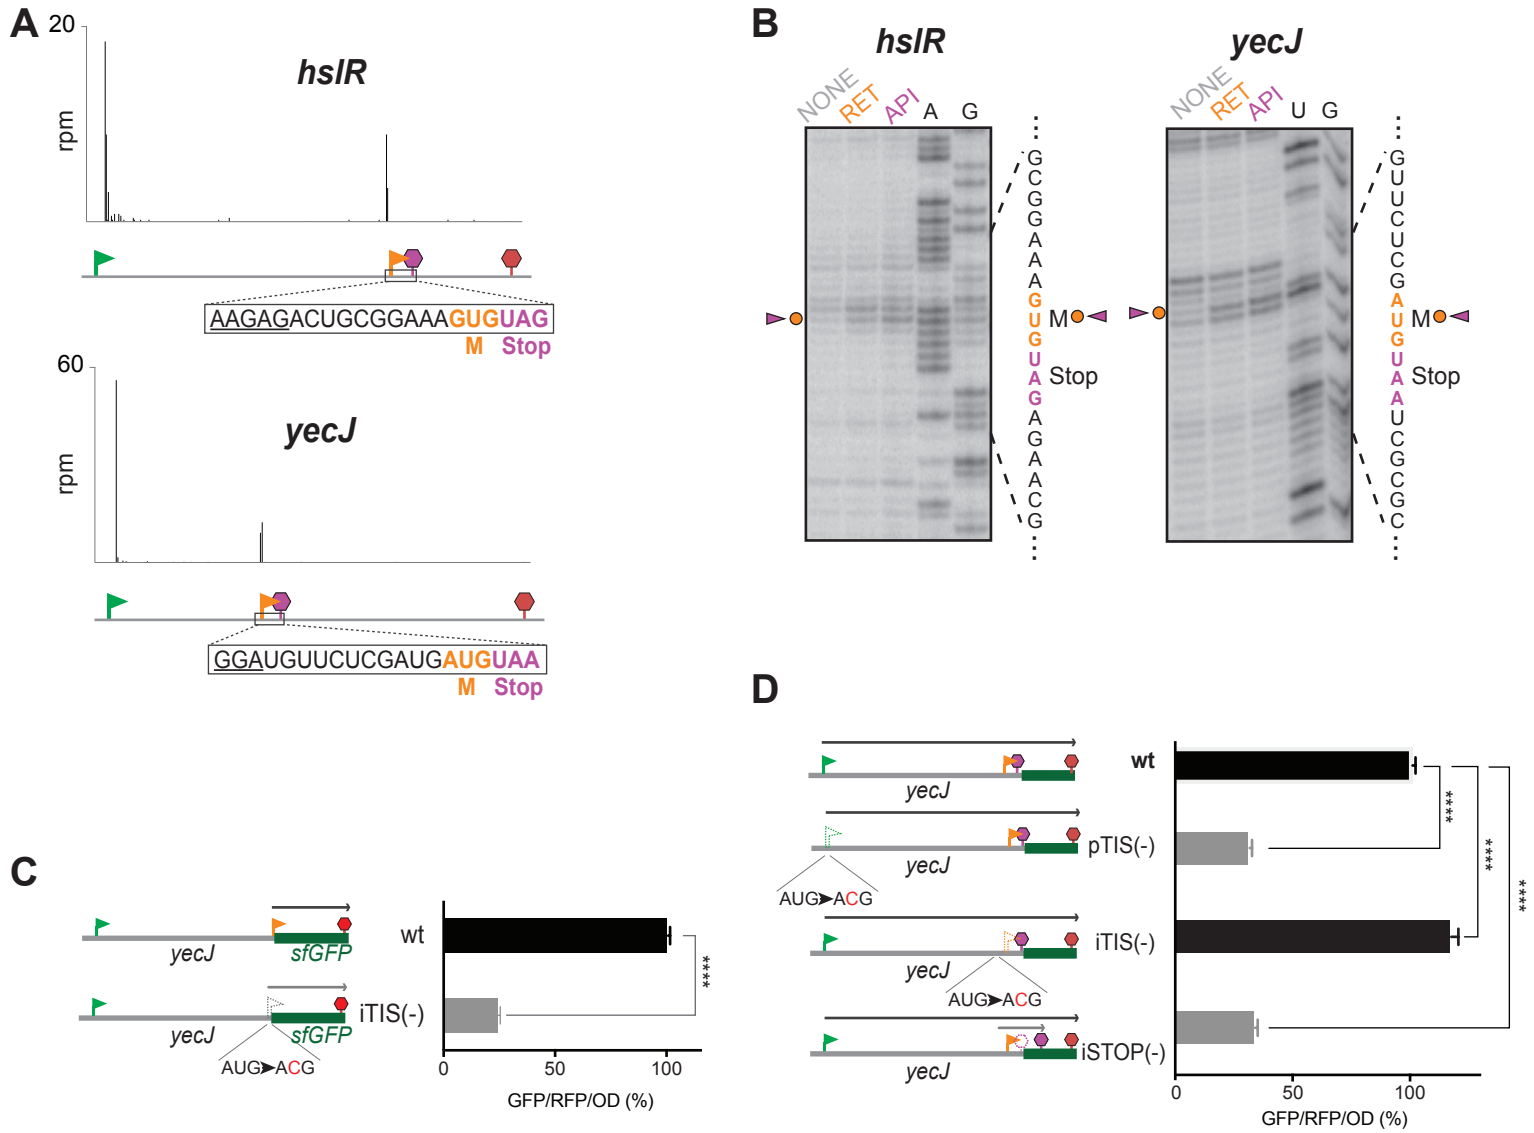

## **Retapamulin-assisted ribosome profiling reveals the alternative bacterial proteome**

Sezen Meydan<sup>1+</sup>, James Marks<sup>1++</sup>, Dorota Klepacki<sup>1</sup>, Virag Sharma<sup>2</sup>,  
Pavel Baranov<sup>3</sup>, Andrew Firth<sup>4</sup>, Tõnu Margus<sup>1†</sup>, Amira Kefi<sup>1</sup>, Nora Vázquez-  
Laslop<sup>1\*</sup> and Alexander S. Mankin<sup>1\*</sup>

### **SUPPLEMENTARY INFORMATION**

**A**

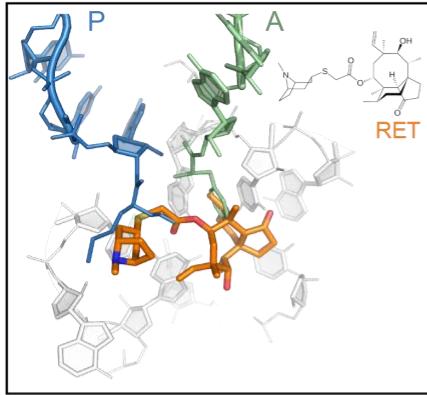

**B**

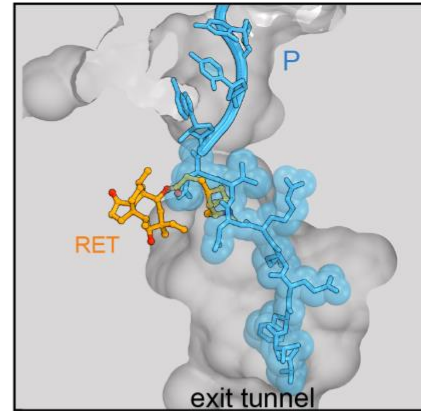

**C**

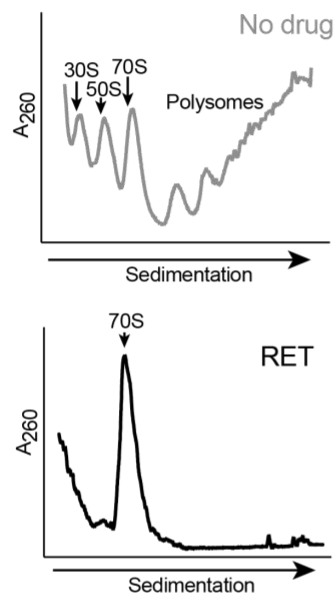

**D**

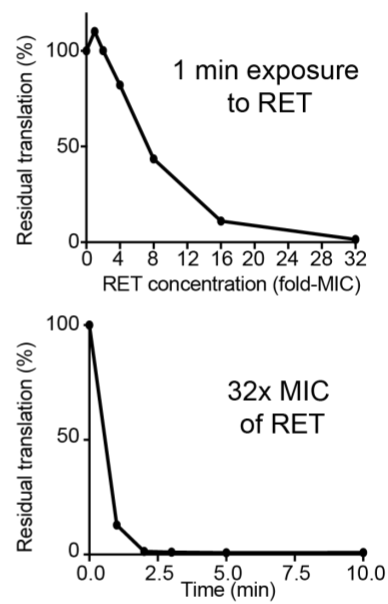

**E**

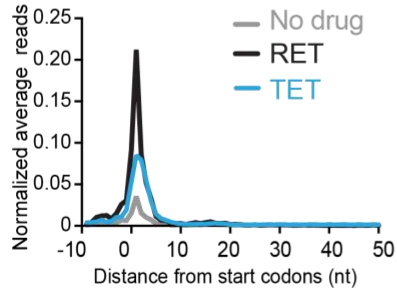

**F**

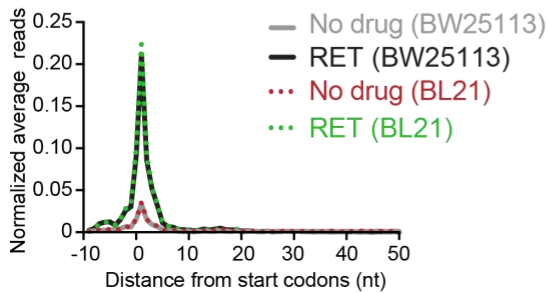

**G**

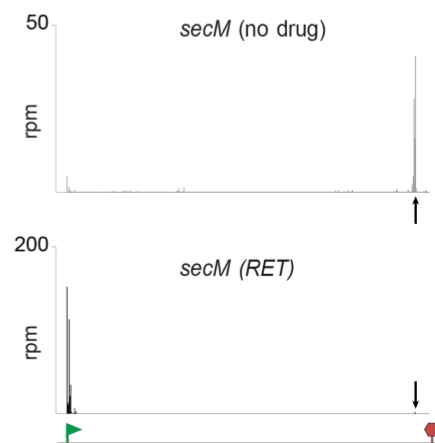

**Figure S1 Retapamulin arrests ribosomes at initiation**, Related to Figure 1

(A) The chemical structure of the pleuromutilin antibiotic retapamulin (RET) bound at the PTC active site of the bacterial ribosome. The model is based on the structural alignment of the 50S ribosomal subunit of *Deinococcus radiodurans* (*Dr*) ribosomes in complex with RET (PDB 2OGO) (Davidovich et al., 2007) and *Thermus thermophilus* 70S ribosomes with fMet-tRNA bound in the P site and Phe-tRNA in the A site (PDB 1VY4) (Polikanov et al., 2014). Note that in the 70S initiation complex, the fMet moiety of the initiator tRNA has to be displaced from the PTC active site to allow for RET binding.

(B) RET cannot coexist with a nascent protein in the ribosome. Alignment of the structures of the *Dr* 50S RET complex with the *E. coli* 70S ribosome carrying ErmBL nascent peptide that esterifies P-site tRNA (PDB 5JTE) (Arenz et al., 2016).

(C) Sucrose gradient analysis of polysome preparation from *E. coli* BW25113  $\Delta toIC$  cells untreated (top) or treated for 5 min with 12.5  $\mu\text{g}/\text{mL}$  (100X MIC) RET. The shown profiles represent cryo-lyzed preparations used in Ribo-seq experiments. Qualitatively similar results have been obtained in analytical experiments with the samples prepared by freezing-thawing (see STAR Methods).

(D) Residual protein synthesis in *E. coli* BL21  $\Delta toIC$  cells treated with RET, as estimated by incorporation of [ $^{35}\text{S}$ ]-methionine into the TCA-insoluble protein fraction, after 1 min exposure to increasing concentrations of RET (top) or treated with 2  $\mu\text{g}/\text{mL}$  of RET (32-fold MIC) for the indicated periods of time (bottom).

(E) Metagene plots comparing the normalized average relative density of ribosomal footprints in *E. coli* BW25113  $\Delta toIC$  cells untreated (gray trace) or treated 12.5  $\mu\text{g}/\text{mL}$  (100X MIC) of RET (black trace). Blue trace represents similar analysis of the publicly-available Ribo-seq data obtained with *E. coli* BW25113  $\Delta smpB$  cells exposed to tetracycline (TET) [the average of two replicates of Ribo-seq experiments reported in (Nakahigashi et al., 2016)].

(F) Metagene plots comparing the normalized average relative density of ribosomal footprints in the *E. coli* strains BW25113  $\Delta toIC$  cells or *E. coli* BL21  $\Delta toIC$  untreated or treated with RET.

(G) Snapshot of ribosomal footprints density in the *secM* gene of *E. coli* BW25113  $\Delta toIC$  cells untreated or treated with RET. The pTIS and stop codon of the gene are indicated by a green flag and red stop sign, respectively. The black arrow indicates the known site of translation arrest at the codon 165 of the 170-codon *secM* ORF (Nakatogawa and Ito, 2002).

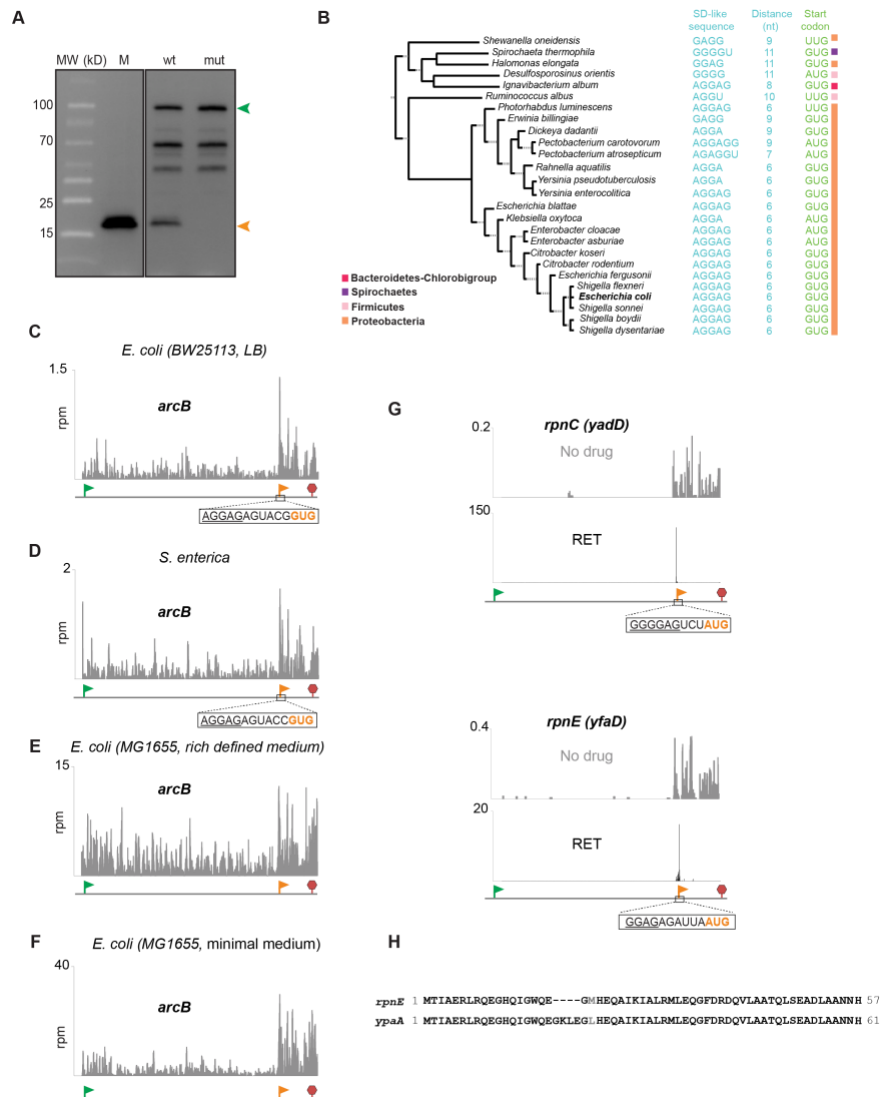

**Figure S2 The utilization of an in-frame iTIS within the *arcB* gene leads to production of an alternative protein ArcB-C with a potential role in cell physiology, Related to Figure 3**

(A) The uncropped image of the immunoblot shown in Figure 3E, representing the bands corresponding to full-length ArcB-3X FLAG and internal initiation product ArcB-C-3XFLAG (marked with arrow heads). Protein size markers are shown. The origin of the bands marked with dots is unknown.

(B) The iTIS that directs translation of the ArcB-C protein is conserved in the *arcB* gene of diverse bacterial species. The putative start codons and the SD-like sequences are shown.

(C-F) The upshift of ribosomal footprints in the *arcB* segment encoding ArcB-C observed in the Ribo-seq profiles of untreated *E. coli* or *Salmonella enterica* cells (Baek et al., 2017; Kannan et al., 2014; Li et al., 2014). The pTIS and iTIS of *arcB*



are marked with green and orange flags, respectively, and the stop codon is indicated by a red stop sign.

(G) Representative examples of Ribo-RET and Ribo-seq profiles of two out of five *E. coli rpn* genes.

(H) Alignment of the amino acid sequence of the RpnE-C protein, translated from the iTIS within the *rpnE* gene and the protein encoded in an independent gene *ypaA*.

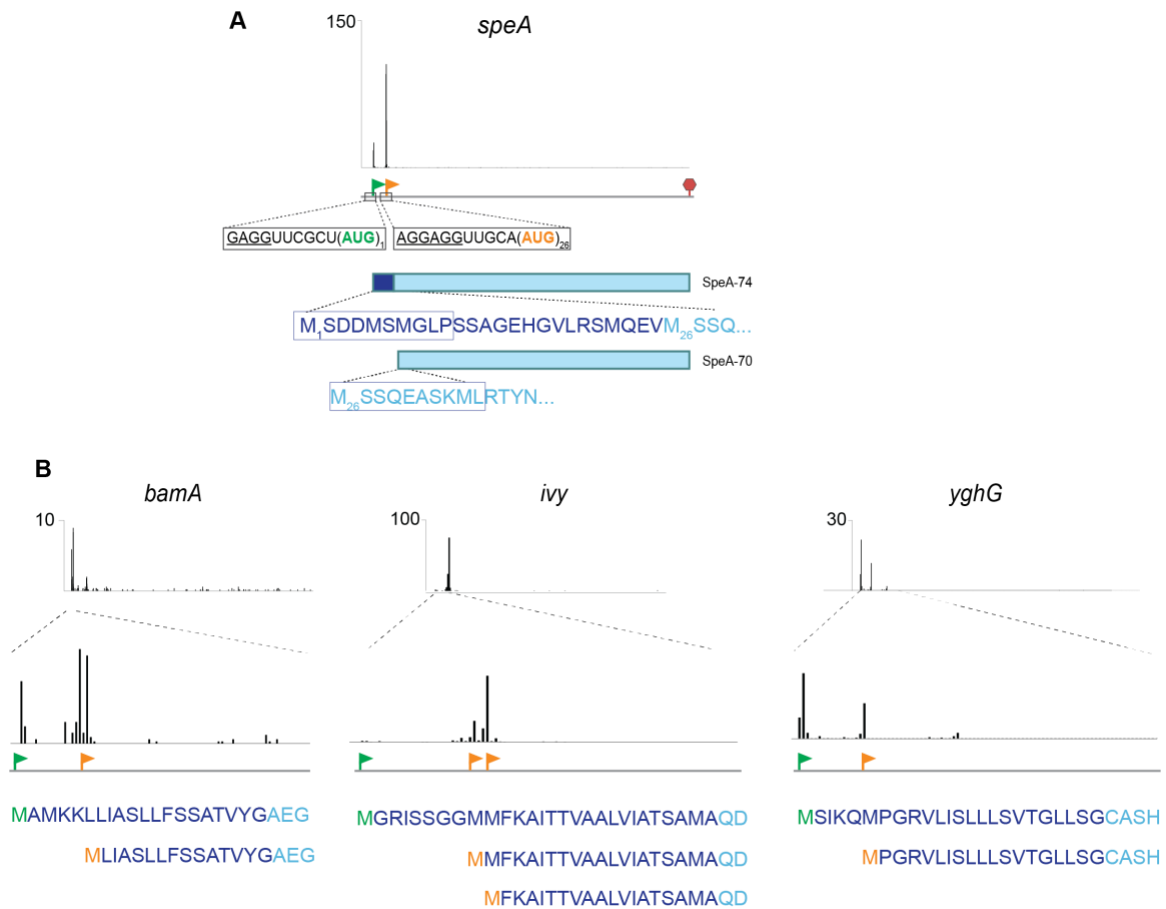

**Figure S3. Initiation at the 5'-end proximal iTISs could produce alternative products with incomplete N-terminal signal sequences, Related to Figure 4**

(A) Ribo-RET profile of the *speA* gene, showing peaks corresponding to pTIS (green flag) and iTIS (orange flag). The stop codon is indicated by a red stop sign. The putative signal sequence (indicated by dark blue letters) of SpeA-74 (Buch and Boyle, 1985) is lacking in the alternative product SpeA-70 whose translation is initiated at the iTIS. The SpeA isoforms, whose translation is initiated at the pTIS or the iTIS are expected to have different cellular localization. The peptides detected by N-terminomics are boxed (Bienvenut et al., 2015).

(B) Ribo-RET profiles of *bamA*, *ivy* and *yghG* genes. The N-terminal amino acid sequences of the primary and predicted alternative proteins are indicated. The reported signal sequences are shown in dark blue. The pTISs of the genes are marked by green flags; iTISs are indicated with orange flags.

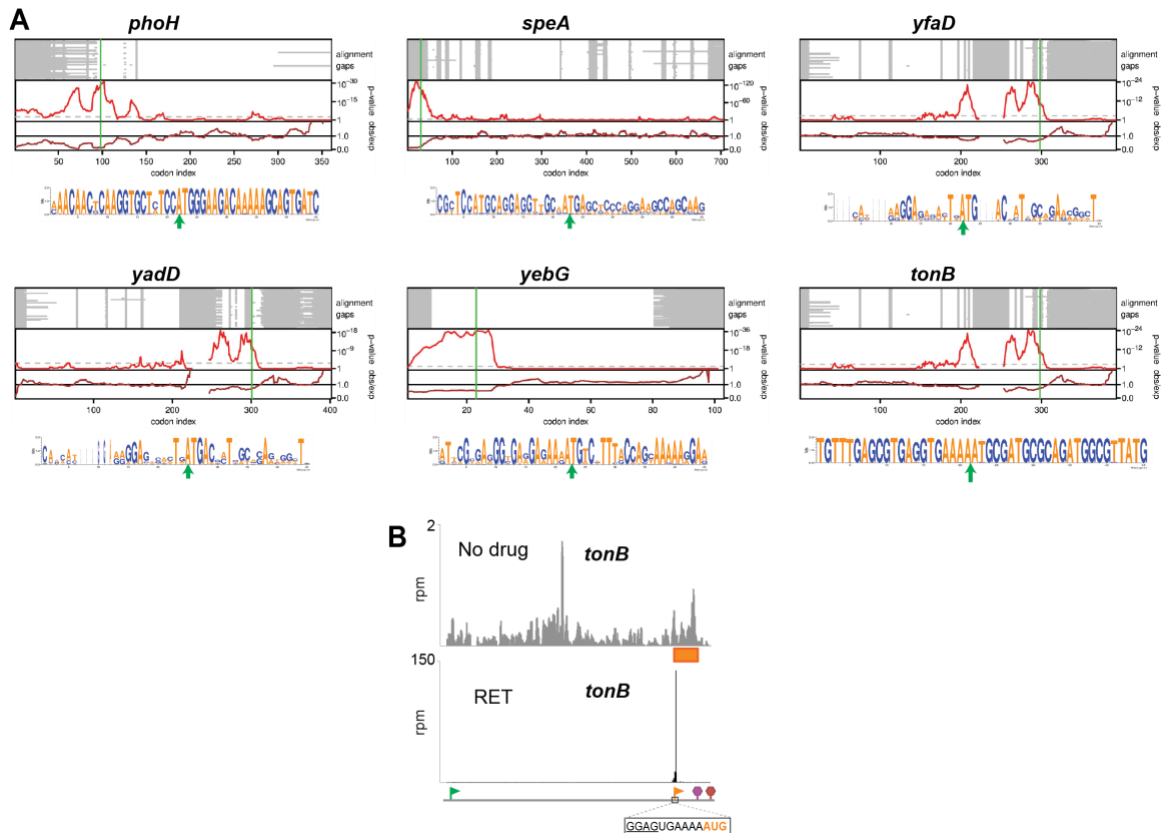

**Figure S4. Synonymous site conservation for selected iTISs, Related to Figures 3-5**

(A) Synonymous site conservation plots and weblogos for genes with in-frame iTISs (*phoH*, *speA*, *yfaD*, *yadD*, *yebG*) and for the *tonB* gene with an OOF iTIS. Alignment gaps in each sequence are indicated in grey. The two panels show the synonymous substitution rate in a 15-codon sliding window, relative to the CDS average (observed/expected; brown line) and the corresponding statistical significance ( $p$ -value; red line). The horizontal dashed grey line indicates a  $p$ -value of  $0.05 / (\text{CDS length} / \text{window size})$  – an approximate correction for multiple testing within a single CDS.

(B) An upshift in the local density of ribosome footprints within the alternative frame defined by the *tonB* OOF iTIS (orange rectangle) in cells not exposed to antibiotic. Start codons of the pTIS and OOF iTIS are marked with green and orange flags, respectively, while the respective stop codons are indicated with red and purple stop signs. The start codon and SD-like sequence of the iTIS are shown.

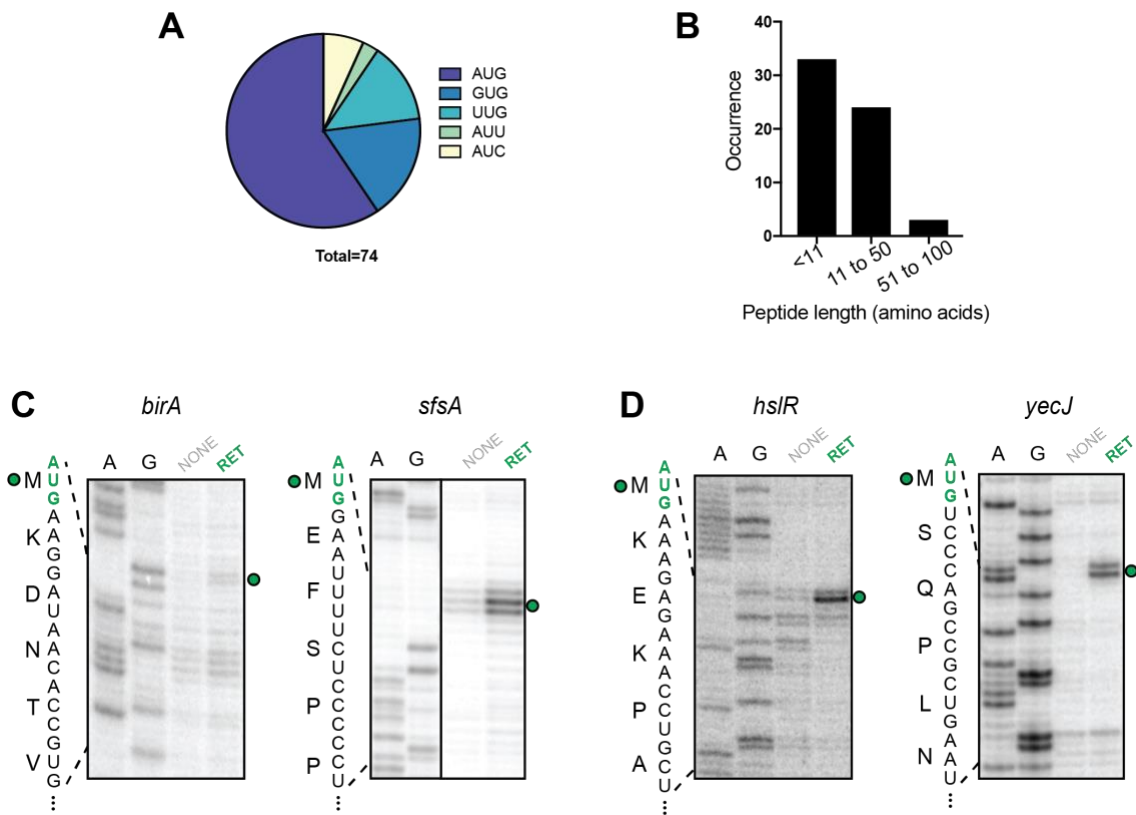

**Figure S5 Ribo-RET reveals OOF iTISs, Related to Figures 4 and 5**

(A) The distribution of start codons associated with OOF iTISs revealed by Ribo-RET.

(B) The length distribution of the putative alternative proteins whose translation is initiated at OOF iTISs.

(C) and (D) Toe-printing gels showing RET-induced ribosome stalling at the pTISs of *birA* and *sfsA* (shown in Figure 4) and *hsIR* and *yecJ* (shown in Figure 5) genes. Samples analyzed in the lanes marked NONE contained no antibiotics. Start codons of the pTISs are indicated in green. Sequencing lanes are shown.

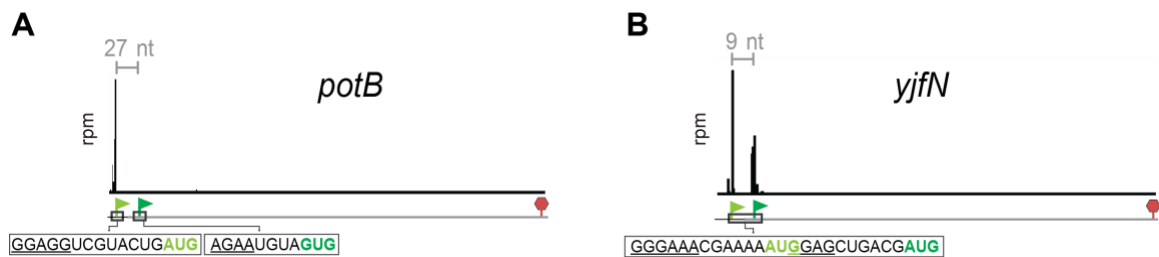

**Figure S6. Examples of the genes with Ribo-RET identified TISs outside of the coding regions, Related to Figure 1**

(A) Ribo-RET profile of the *potB* gene, shows no peak of the ribosome density at the start codon of the annotated pTIS (dark green flag), but instead reveals a strong peak at an in-frame start codon 27 nt upstream (pale green flag).

(B) In the *yjfN* gene, Ribo-RET reveals peak at the annotated pTIS (dark green flag) and an additional peak 9 nts upstream from it (marked with a pale green flag). The sequences surrounding the two TISs, including the SD-like regions (underlines) are shown.

See Table S2 for other cases of Ribo-RET signals outside of the coding regions.

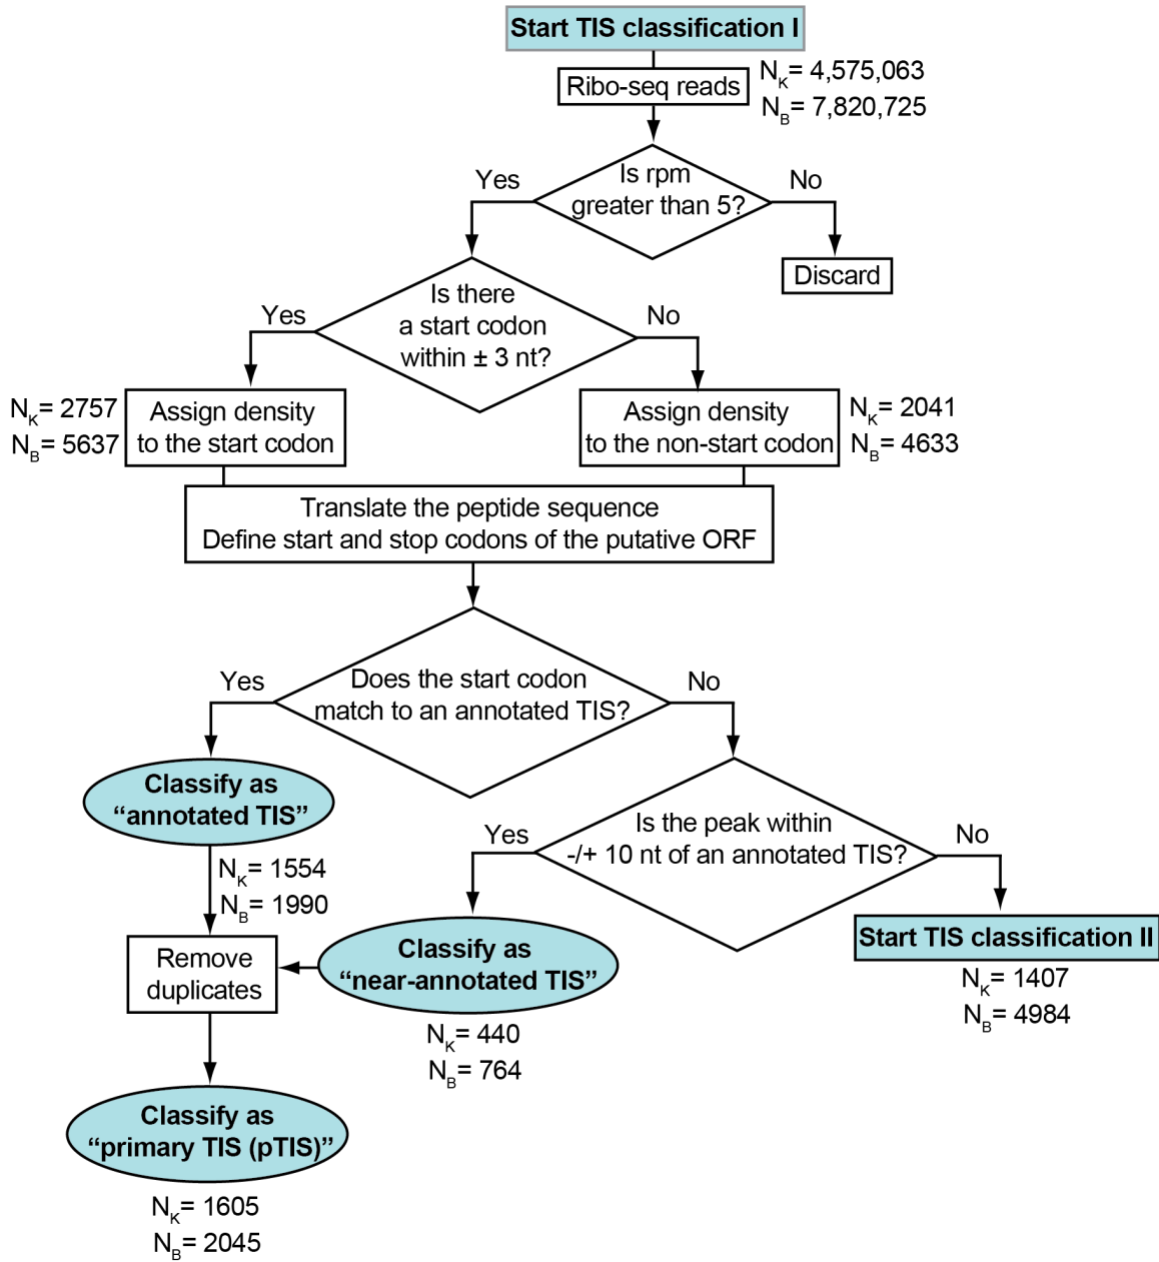

**Scheme 1**

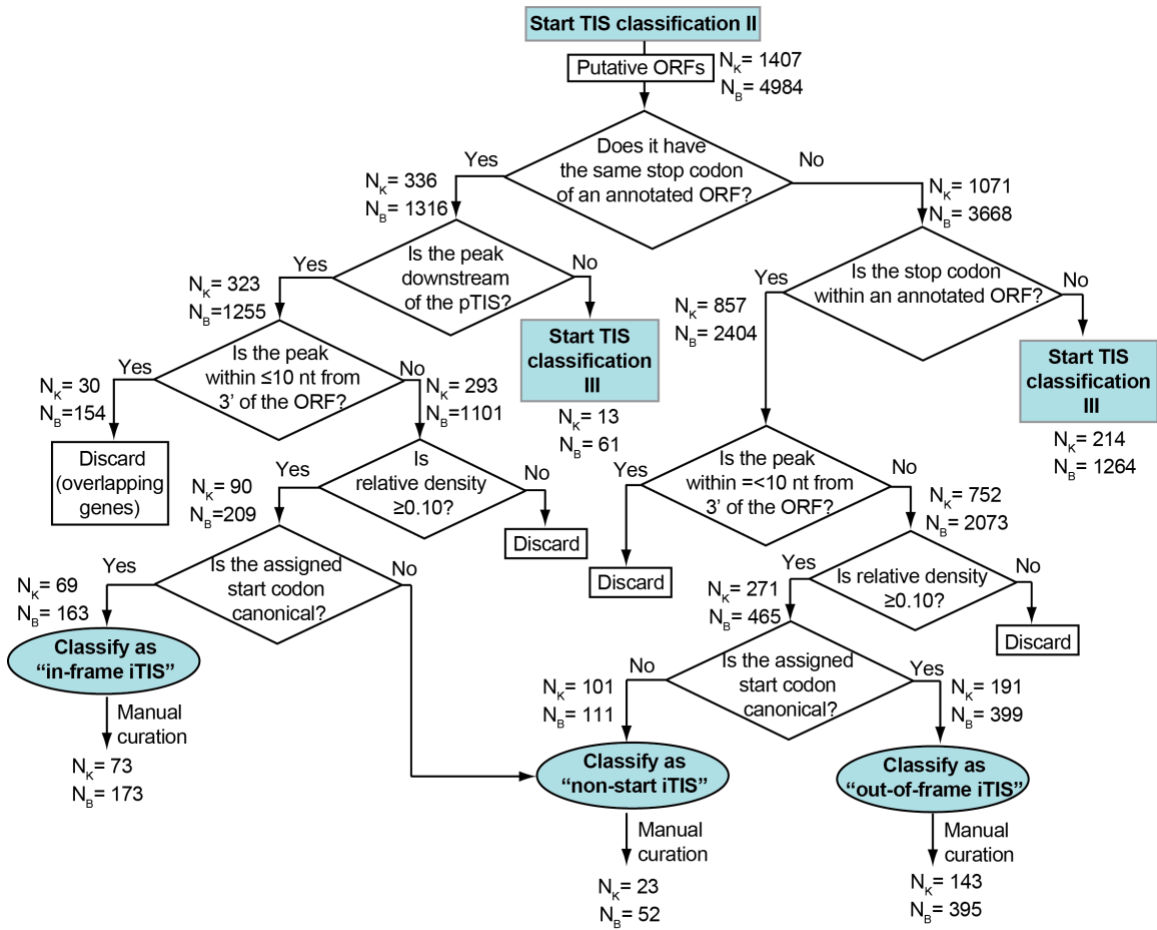

**Scheme 2**

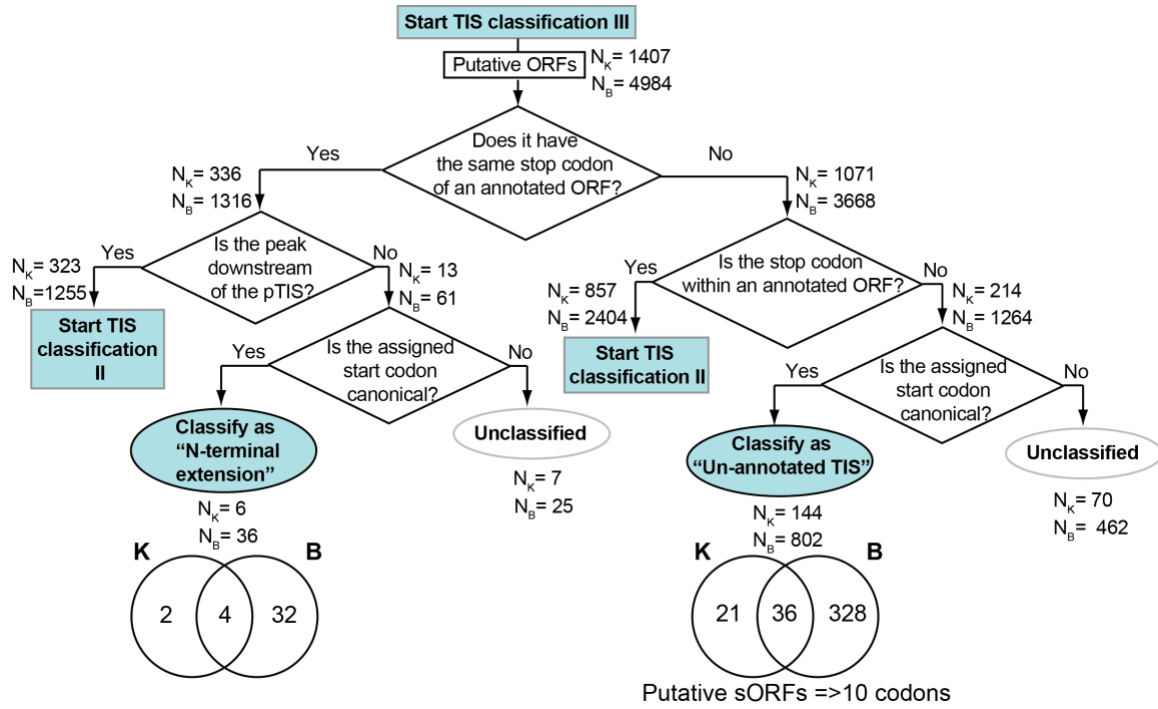

**Scheme 3**



**Table S1:** List of common and strain-specific iTISs identified by Ribo-RET in the *E. coli* strains BW25113 and BL21.

**Table S2:** List of common and strain-specific TISs identified by Ribo-RET in the *E. coli* strains BW25113 and BL21 outside of the annotated genes

**Table S3:** List of primers and synthetic DNA fragments used in this study

## Supplementary Information References

- Arenz, S., Bock, L.V., Graf, M., Innis, C.A., Beckmann, R., Grubmüller, H., Vaiana, A.C., and Wilson, D.N. (2016). A combined cryo-EM and molecular dynamics approach reveals the mechanism of ErmBL-mediated translation arrest. *Nat. Commun.* *7*, 12026.
- Baek, J., Lee, J., Yoon, K., and Lee, H. (2017). Identification of unannotated small genes in *Salmonella*. *G3 (Bethesda)* *7*, 983-989.
- Bienvenut, W.V., Giglione, C., and Meinel, T. (2015). Proteome-wide analysis of the amino terminal status of *Escherichia coli* proteins at the steady-state and upon deformylation inhibition. *Proteomics* *15*, 2503-2518.
- Buch, J.K., and Boyle, S.M. (1985). Biosynthetic arginine decarboxylase in *Escherichia coli* is synthesized as a precursor and located in the cell envelope. *J. Bacteriol.* *163*, 522-527.
- Davidovich, C., Bashan, A., Auerbach-Nevo, T., Yaggie, R.D., Gontarek, R.R., and Yonath, A. (2007). Induced-fit tightens pleuromutilins binding to ribosomes and remote interactions enable their selectivity. *Proc. Natl. Acad. Sci. U. S. A.* *104*, 4291-4296.
- Kannan, K., Kanabar, P., Schryer, D., Florin, T., Oh, E., Bahroos, N., Tenson, T., Weissman, J.S., and Mankin, A.S. (2014). The general mode of translation inhibition by macrolide antibiotics. *Proc. Natl. Acad. Sci. U. S. A.* *111*, 15958-15963.
- Li, G.W., Burkhardt, D., Gross, C., and Weissman, J.S. (2014). Quantifying absolute protein synthesis rates reveals principles underlying allocation of cellular resources. *Cell* *157*, 624-635.
- Nakahigashi, K., Takai, Y., Kimura, M., Abe, N., Nakayashiki, T., Shiwa, Y., Yoshikawa, H., Wanner, B.L., Ishihama, Y., and Mori, H. (2016). Comprehensive identification of translation start sites by tetracycline-inhibited ribosome profiling. *DNA Res.* *23*, 193-201.
- Nakatogawa, H., and Ito, K. (2002). The ribosomal exit tunnel functions as a discriminating gate. *Cell* *108*, 629-636.
- Polikanov, Y.S., Steitz, T.A., and Innis, C.A. (2014). A proton wire to couple aminoacyl-tRNA accommodation and peptide-bond formation on the ribosome. *Nat. Struct. Mol. Biol.* *21*, 787-793.

# **Retapamulin-assisted ribosome profiling reveals the alternative bacterial proteome**

Sezen Meydan, James Marks, Dorota Klepacki, Virag Sharma, Pavel V. Baranov, Andrew E. Firth, Tõnu Margus, Amira Kefi, Nora Vázquez-Laslop and Alexander S. Mankin

## **STAR METHODS**

## Bacterial strains

Ribo-seq experiments were performed in two *E. coli* strains: the K12-type strain BW25113 (*lacI*<sup>d</sup>, *rrnB*<sub>T14</sub>,  $\Delta$ *lacZ*WJ16, *hsdR514*,  $\Delta$ *araBAD*<sub>AH33</sub>,  $\Delta$ *rhaBAD*<sub>LD78</sub>) that was further rendered  $\Delta$ *tolC* (called previously BWDK Kannan, 2012 #81}) and the B-type strain, BL21, (*F*<sup>-</sup>, *ompT*, *gal*, *dcm*, *lon*, *hsdS*<sub>B</sub>(*r*<sub>B</sub><sup>-</sup>*m*<sub>B</sub><sup>-</sup>)[*malB*<sup>+</sup>]<sub>K-12</sub> ( $\lambda$ <sup>S</sup>) and was also rendered  $\Delta$ *tolC* by recombineering (Datsenko and Wanner, 2000). For that, the kanamycin resistance cassette was PCR-amplified from BW25113 *tolC::kan* strain from the Keio collection (Baba et al., 2006) using the primers #P1 and P2 (Table S3). The PCR fragment was transformed into BL21 cells (NEB, #C2530H) carrying the Red recombinase expressing plasmid pKD46. After selection and verification of the BL21 *tolC::kan* clone, the kanamycin resistance marker was eliminated as previously described (Datsenko and Wanner, 2000). In the subsequent sections of STAR Methods we will refer to BW25113( $\Delta$ *tolC*) strain as 'K' strain and to BL21( $\Delta$ *tolC*) as 'B' strain.

Reporter plasmids were expressed in the *E. coli* strain JM109 (*endA1*, *recA1*, *gyrA96*, *thi*, *hsdR17* (*r*<sub>K</sub><sup>-</sup>, *m*<sub>K</sub><sup>+</sup>), *relA1*, *supE44*,  $\Delta$ (*lac-proAB*), [*F*<sup>'</sup> *traD36*, *proAB*, *laqI*<sup>q</sup>Z $\Delta$ M15]) (Promega, #P9751).

## Metabolic labeling of proteins

Inhibition of protein synthesis by RET was analyzed by metabolic labeling as described previously (Kannan et al., 2012). Specifically, the B strain cells were grown overnight at 37°C in M9 minimal medium supplemented with 0.003 mM thiamine and 40  $\mu$ g/mL of all 19 amino acids except methionine (M9AA-Met). Cells

were diluted 1:200 into fresh M9AA-Met medium and grown at 37°C until the culture density reached  $A_{600} \sim 0.2$ . Subsequent operations were performed at 37°C. The aliquots of cell culture (28  $\mu\text{L}$ ) were transferred to Eppendorf tubes that contained dried-down RET (Sigma-Aldrich, #CDS023386). The final RET concentration ranged from 1x MIC to 32x MIC (0.06  $\mu\text{g}/\text{mL}$  to 2  $\mu\text{g}/\text{mL}$ ). After incubating cells with antibiotic for 3 min, the content was transferred to another tube containing 2  $\mu\text{L}$  M9AA-Met medium supplemented with 0.3  $\mu\text{Ci}$  of L-[ $^{35}\text{S}$ ]-methionine (specific activity 1,175 Ci/mmol) (MP Biomedicals). After 1 min incubation, 30  $\mu\text{L}$  of 5% trichloroacetic acid (TCA) was added to the cultures and this mixture was pipetted onto 35 mm 3MM paper discs (Whatman, Cat. No. 1030-025) pre-wetted with 25  $\mu\text{L}$  of 5% TCA. The discs were then placed in a beaker with 500 mL 5% TCA and boiled for 5 min. TCA was discarded and this step was repeated one more time. Discs were rinsed in acetone, air-dried and placed in scintillation vials. After addition of 5 ml of scintillation cocktail (Perkin Elmer, Ultima Gold, #6013321) the amount of retained radioactivity was measured in a Scintillation Counter (Beckman, LS 6000). The data obtained from RET-treated cells were normalized to the no-drug control.

The time course of inhibition of protein synthesis by RET was monitored following essentially the same procedure except that antibiotic was added to a tube with the cells and 28  $\mu\text{L}$  aliquots were withdrawn after specified time and added to tubes containing 2  $\mu\text{L}$  M9AA-Met medium supplemented with 0.3  $\mu\text{Ci}$  of L-[ $^{35}\text{S}$ ]-methionine. The rest of the steps were as described above.

## Ribo-seq experiments

The Ribo-seq experiments were carried out following previously described procedures (Becker et al., 2013; Oh et al., 2011). The overnight cultures of *E. coli* grown in LB medium at 37°C were diluted to  $A_{600} \sim 0.02$  in 100 mL of fresh LB media sterilized by filtration and supplemented with 0.2% glucose. The cultures were grown at 37°C with vigorous shaking to  $A_{600} \sim 0.5$ . RET was added to the final concentration of 100X MIC (12.5  $\mu\text{g}/\text{mL}$  for the K strain or 5  $\mu\text{g}/\text{mL}$  for the B strain) and incubated for 5 min (K strain) or 2 min (B strain). No antibiotic was added to the control no-drug cultures. Cells were harvested by rapid filtration, frozen in liquid nitrogen, cryo-lysed in 650  $\mu\text{L}$  of buffer containing 20 mM Tris-HCl, pH 8.0, 10 mM  $\text{MgCl}_2$ , 100 mM  $\text{NH}_4\text{Cl}$ , 5 mM  $\text{CaCl}_2$ , 0.4% Triton X100, 0.1% NP-40 and supplemented with 65 U RNase-free DNase I (Roche, #04716728001), 208 U SUPERase•In™ RNase inhibitor (Invitrogen, #AM2694) and GMPPNP (Sigma-Aldrich, #G0635) to the final concentration of 3 mM. After clarifying the lysate by centrifugation at 20,000 g for 10 min at 4°C samples were subjected to treatment with ~450 U MNase (Roche, #10107921001) per 25  $A_{260}$  of the cells for 60 min. The reactions were stopped by addition of EGTA to the final concentration of 5 mM and the monosome peak was isolated by sucrose gradient centrifugation. RNA was extracted and run on a 15% denaturing polyacrylamide gel. RNA fragments ranging in size from ~28 to 45 nt were excised from the gel, eluted and used for library preparation as previously described (Becker et al., 2013; Oh et al., 2011). Resulting Ribo-seq data was analyzed using the GALAXY pipeline (Afgan et al., 2016; Kannan et al., 2014). The reference genome sequences U00096.3

(BW25113, 'K' strain) and CP001509.3 (BL21, 'B' strain) were used to map the Ribo-seq reads. The first position of the P-site codon was assigned by counting 15 nucleotides from the 3' end of the Ribo-seq reads. The Ribo-seq datasets were deposited under accession number GSE1221129.

### **Metagene analysis**

The genes with the total rpm values  $\geq 100$  in both control and RET-treated samples were used for metagene analysis of K and B strains. The published tetracycline Ribo-seq data (Nakahigashi et al., 2016) were used to generate the corresponding metagene plot. The genes separated by less than 50 bp from the nearest neighboring gene were not included in the metagene analysis in order to avoid the 'overlapping genes' effects.

For every nucleotide of a gene, normalized reads were calculated by dividing reads per million (rpm) values assigned to a nucleotide by the total rpm count for the entire gene including 30 nt flanking regions. The metagene plot was generated by averaging the normalized reads for the region spanning 10 nt upstream and 50 nucleotides downstream of the first nucleotide of the start codon.

### **Computational identification of translation initiation sites**

The assignment of RET peaks to the start codons was performed using the algorithm provided in Supplemental Information. Specifically, we searched for a possible start codon (AUG, GUG, CUG, UUG, AUU, AUC) within 3 nucleotides

upstream or downstream of the Ribo-RET peak. All other codons associated with an internal RET peak were considered as “non-start” codons (Table S1).

For assessing whether Ribo-RET peaks in K strain match the annotated start codons in the genes expressed under no-drug conditions, we calculated the percentage of genes whose rpkms values were  $\geq 100$  in the no-drug conditions and whose corresponding pTIS Ribo-RET peak values were  $>1$  rpm. More stringent criteria were used for identification of alternative Ribo-RET peaks (rpm  $>5$ ). If the Ribo-RET peak matched an annotated TIS, it was classified as pTIS (Classification I, Scheme I and Table S1). “Tailing peaks” (peaks within 10 nt downstream and upstream of the start codon) around the pTIS were considered as “near-annotated TIS” and merged with the pTISs after removing duplicates. All pTISs prior to duplicate removal are provided in Table S1 (the ‘pTISs’ tabs). The Ribo-RET peaks within coding regions were considered in Classification II and were assigned as in-frame or out-of-frame iTISs depending on the position of the likely start codon (Table S1, the ‘iTISs’ tabs). Finally, the RET peaks outside of the coding regions were considered either as N-terminal extensions or unannotated ORFs (Classification III and Table S2). The criteria for each classification are detailed in Schemes I, II and III in Supplementary Information.

### **Construction of ArcB-expressing plasmids**

The plasmids carrying the wt *arcB* gene or its mutant variant (G1947A, G1950A, G1959C) were generated by Gibson assembly (Gibson et al., 2009). The PCR-generated fragments covering the length of wt or mutant *arcB* genes or of the ArcB-

C coding *arcB* segment were introduced into *NcoI* and *HindIII*-cut pTrc99A plasmid (Amann et al., 1988). Three PCR fragments used for the assembly of wt *arcB* plasmid were generated by using primer pairs P3/P4, P5/P6 and P7/P8 (Table S3). To construct the mutant *arcB* plasmid, the PCR fragments were generated by using primer pairs P3/P9, P7/P8 and P10/P11. The insert for the ArcB-C marker plasmid assembly was acquired as a gBlock (fragment #12 in Table S3). All the plasmids were verified by Sanger sequencing of the inserts. The plasmids were introduced in the *E. coli* BW25113 strain.

### **Western blot analysis of the FLAG-tagged ArcB**

The BW25113 cells carrying either wt or mutant *arcB* plasmids (or the plasmid encoding the marker ArcB-C segment of ArcB) were grown overnight at 37°C in LB medium supplemented with ampicillin (final concentration of 50 µg/mL). The cultures were diluted 1:100 into 5 mL LB/ampicillin medium supplemented with 0.01 mM of isopropyl-β-D-1-thiogalactopyranoside (IPTG) and grown at 37°C until culture density reached  $A_{600} \sim 0.5$ . The cultures were harvested by centrifugation. Cells were resuspended in 300 µL of B-PER™ Bacterial Protein Extraction Reagent (Thermo Fisher, #78248) and centrifuged at 16,000 g for 10 min. Ten µL of the cell lysate were loaded on TGX 4-20% gradient gel (Bio-Rad, #4561096). Resolved proteins were transferred to a PVDF membrane using PVDF transfer pack (Bio-Rad, #1704156) by electroblotting (Bio-Rad Trans-Blot SD Semi-Dry Transfer Cell, 10 min at 25 V). Membrane was blocked by incubating in TBST (50 mM M Tris [pH 7.4], 150 mM NaCl, and 0.05% Tween-20) containing 5% non-fat



dry milk and probed with Anti-FLAG M2-Peroxidase (Sigma-Aldrich, #A8592) and anti-GAPDH antibodies (Thermo Fisher, #MA5-15738-HRP) at 1:1000 dilution in TBST. The blot was developed using Clarity Western ECL Substrate (Bio-Rad, #170-5060) and visualized (Protein Simple, FluorChem R).

### **Toeprinting assay**

The DNA templates for toeprinting, were prepared by PCR amplification for the respective genes from the *E. coli* BW25113 genomic DNA. The following primer pairs were used for amplification of specific genes: *atpB*: P13/P14; *mgo*: P15/P16; *birA*: P18/P19; *hslR*: P30/P31; *yecJ*: P33/P34. Two point mutations were generated in *sfsA* in order to change the stop codon of the alternative ORF from TGA to TAG because in the PURE transcription-translation system, the termination inhibitor Api137 arrest termination at the TAG stop codon with a higher efficiency (Florin et al., 2017). This was achieved by first amplifying segments of the *sfsA* gene using pairs of primers P22/P23 and P24/P25 and then assembling the entire mutant *sfsA* sequence by mixing the PCR products together and re-amplifying using primers P26/P27. Toeprinting primer P17 was used with the *atpB* and *mgo* templates. Primers P20, P28, P32 and P36 were used for analysis of ribosome arrest at pTIS of *birA*, *sfsA*, *hslR* and *yecJ* templates, respectively. Primers P21, P29, P33 and P37 were used for the analysis of ribosome arrest at the iTISs of *birA*, *sfsA*, *hslR* and *yecJ* templates, respectively.

Transcription-translation was performed in 5  $\mu$ L reactions of the PURExpress system (New England Biolabs, #E6800S) for 30 min at 37°C as previously

described (Orelle et al., 2013). Final concentration of RET, tetracycline (Fisher scientific, #BP912-100) or Api137 (synthesized by NovoPro Biosciences, Inc.) was 50  $\mu$ M. The primer extension products were resolved on 6% sequencing gels. Gels were dried, exposed overnight to phosphorimager screens and scanned on a Typhoon Trio phosphorimager (GE Healthcare).

### **Polysome analysis**

For the analysis of the mechanism of RET action, the overnight culture of the K strain was diluted 1:200 in 100 mL of LB medium supplemented with 0.2% glucose. The culture was grown at 37°C with vigorous shaking to  $A_{600} \sim 0.4$  at which point RET was added to the final concentration of 100X MIC (12.5  $\mu$ g/mL) (control culture was left without antibiotic). After incubation for 5 min at 37°C with shaking, cultures were transferred to pre-warmed 50 mL tubes and cells were pelleted by centrifugation in a pre-warmed 37°C Beckman JA-25 rotor at 8,000 rpm for 5 min. Pellets were resuspended in 500  $\mu$ L of cold lysis buffer (20mM Tris-HCl, pH7.5, 15 mM  $MgCl_2$ ), transferred to an Eppendorf tube and frozen in a dry ice/ethanol bath. Tubes were then thawed in an ice-cold water bath and 50  $\mu$ L of freshly prepared lysozyme (10 mg/ml) was added. Freezing/thawing cycle was repeated two more times. Lysis was completed by addition of 15  $\mu$ L of 10% sodium deoxycholate (Sigma, #D6750) and 2  $\mu$ L (2U) of RQ1 RNase-free DNase (Promega, #M610A) followed by incubation on ice for 3 min. Lysates were clarified by centrifugation in a table-top centrifuge at 20,000 g for 15 min at 4°C. Three  $A_{260}$  of the lysate were loaded on 11 ml of 10%-40% sucrose gradient in buffer 20 mM Tris-HCl, pH 7.5,

10mM MgCl<sub>2</sub>, 100 mM NH<sub>4</sub>Cl<sub>2</sub>, 2 mM β-mercaptoethanol. Gradients were centrifuged for 2 h in a Beckman SW-41 rotor at 39,000 rpm at 4°C. Sucrose gradients were fractionated using Piston Gradient Fractionator (Biocomp).

### **Construction of the reporter plasmids**

The RFP/GFP plasmids were derived from the pRXG plasmid, kindly provided by Dr. Barrick (University of Texas). The vector was first reconstructed by cutting pRXG with *EcoRI* and *SaII* and re-assembling its backbone with 2 PCR fragments amplified from pRXG using primer pairs P38/P39 (*rfp* gene) and P40/P41 (*sf-gfp* preceded by a SD sequence). The resulting plasmid (pRXGSM), had RFP ORF with downstream *SpeI* sites flanking the SD-containing *sf*-GFP ORF. To generate pRXGSM-*sfsA* plasmids, *sfsA* sequences were PCR amplified from *E. coli* BW25113 genomic DNA with primers P42/P43, for the wt gene, or P42/P44, for the mutant variant, and assembled with the *SpeI*-cut pRXGSM plasmid. To generate the pRXGSM-*yecJ* reporter plasmids, the pRXGSM was cut with *SpeI* and assembled with each of the PCR fragments generated using the following primer pairs: P45/P46 (iTIS-wt plasmid), P45/P47 (iTIS(-)); P45/P48 (pTIS-wt), P45/P50 (pTIS-iTIS(-)). pRXGSM-*yecJ*-pTIS(-) and pRXGSM-*yecJ*-pTIS-iStop(-) plasmids were generated by site directed mutagenesis of the pRXGSM-*yecJ*-pTIS-wt plasmid using primers P49 and P51, respectively.

### **Fluorescence and cell density measurements**

*E. coli* JM109 cells carrying the reporter plasmids were grown overnight in LB medium supplemented with 50 µg/mL kanamycin (Fisher Scientific, #BP906-5). The cultures were then diluted 1:100 into fresh LB medium supplemented with kanamycin (50 µg/mL) and grown to  $A_{600} \sim 0.5-0.8$ . The cultures were diluted to the final density of  $A_{600} \sim 0.02$  in fresh LB/kanamycin (50 µg/mL) medium supplemented with 0.1 mM IPTG and 120 µL were placed in the wells of a clear flat bottom 96 well microplate (Corning, #353072). The plates were placed in a Tecan Infinite M200 PRO plate reader, where they were incubated at 37°C with orbital shaking (duration: 1000 sec; amplitude: 3 mm), and measurements of optical density (at 600 nm), 'green fluorescence' (excitation: 485 nm; emission: 520 nm) and 'red fluorescence' (excitation: 550 nm and emission: 675 nm) were acquired in real time.

### **Evolutionary conservation analysis**

Protein sequences of the genes of interest were extracted from Ecogene database (Zhou and Rudd, 2013). Homologs for each gene were obtained by performing a tblastn search against the nr database (Altschul et al., 1990). Briefly, the nr database was downloaded on 19/01/2018 to a local server and tblastn searches were performed for each gene (parameters -num\_descriptions 1000000 -num\_alignments 1000000 -evalue 0.0001). Only those tblastn hits which share a sequence identity of at least 45% with the query sequence and whose length is at least 75% of the query sequence were retained. Hits that contain in-frame stop codons were also discarded. Alignments for each gene of interest were generated

by first translating the nucleotide sequences to protein sequences, aligning the protein sequences using Clustal-Omega (Sievers et al., 2011) and then back-translating the aligned protein sequence to their corresponding nucleotide sequence using T-coffee (Notredame et al., 2000). To analyze the conservation of internal start codons for each candidate gene, a 45-nucleotide region containing the internal start codon and 7 codons on either side of the start codon was extracted from each alignment. Sequence logos (Crooks et al., 2004) were built using this region of alignment and visualized to assess the conservation of the internal start codon. In order to determine if there is purifying selection at synonymous positions in the alignment, Synplot2 was used (Firth, 2014). Synplot2 was applied to each alignment (window size – 15 codons) and the resulting plots were visualized to assess the degree of synonymous site variability in the region of internal start codon.

### **Analysis of the conservation of *arcB* internal start site**

Bacterial orthologs of *arcB* were retrieved from OrtholugeDB (Whiteside et al., 2013). Coordinates of histidine-containing phosphotransfer domain (HPT domain) were determined with HMMSEARCH (Wistrand and Sonnhammer, 2005) using the model 0051674 retrieved from Superfamily database version 1.74 (Wilson et al., 2009). For predicting internal initiation site, 40 nt long fragments were extracted containing 12 codons upstream of the predicted beginning of HPT domain and 1 codon downstream. Potential SD-aSD interactions were estimated by scanning the fragment with aSD 5'-ACCUCCU-3' using program RNAhybrid (version date

3/12/2010) (Kruger and Rehmsmeier, 2006) using a  $\Delta G$  threshold of -8.5. The presence of in-frame initiation codons (AUG, GUG, UUG) was checked. If initiation codon was found closer than 15 nt from SD-aSD sequence, the gene was reported to have in-frame iTIS. After removing redundancy for the strains of the same species, internal in-frame iTISs were identified for 26 bacterial species. Maximum Likelihood (ML) tree for 26 *arcB* sequences was computed using ETE command line tools by executing the command: “ete3 -w standard\_fasttree -a arcB\_protein\_seq\_in.fas -o ete\_output” (Huerta-Cepas et al., 2016). Final figure (Figure S2B) was produced with function PhyloTree from ETE3 toolkit (Huerta-Cepas et al., 2016).

## STAR Methods references

- Afgan, E., Baker, D., van den Beek, M., Blankenberg, D., Bouvier, D., Cech, M., Chilton, J., Clements, D., Coraor, N., Eberhard, C., *et al.* (2016). The Galaxy platform for accessible, reproducible and collaborative biomedical analyses: 2016 update. *Nucleic Acids Res.* *44*, W3-W10.
- Altschul, S.F., Gish, W., Miller, W., Myers, E.W., and Lipman, D.J. (1990). Basic local alignment search tool. *J. Mol. Biol.* *215*, 403-410.
- Amann, E., Ochs, B., and Abel, K.J. (1988). Tightly regulated tac promoter vectors useful for the expression of unfused and fused proteins in *Escherichia coli*. *Gene* *69*, 301-315.
- Baba, T., Ara, T., Hasegawa, M., Takai, Y., Okumura, Y., Baba, M., Datsenko, K.A., Tomita, M., Wanner, B.L., and Mori, H. (2006). Construction of *Escherichia coli* K-12 in-frame, single-gene knockout mutants: the Keio collection. *Mol. Syst. Biol.* *2*, 2006 0008.
- Becker, A.H., Oh, E., Weissman, J.S., Kramer, G., and Bukau, B. (2013). Selective ribosome profiling as a tool for studying the interaction of chaperones and targeting factors with nascent polypeptide chains and ribosomes. *Nat. Protoc.* *8*, 2212-2239.
- Crooks, G.E., Hon, G., Chandonia, J.M., and Brenner, S.E. (2004). WebLogo: a sequence logo generator. *Genome Res.* *14*, 1188-1190.
- Datsenko, K.A., and Wanner, B.L. (2000). One-step inactivation of chromosomal genes in *Escherichia coli* K-12 using PCR products. *Proc. Natl. Acad. Sci. U. S. A.* *97*, 6640-6645.
- Firth, A.E. (2014). Mapping overlapping functional elements embedded within the protein-coding regions of RNA viruses. *Nucleic Acids Res.* *42*, 12425-12439.
- Florin, T., Maracci, C., Graf, M., Karki, P., Klepacki, D., Berninghausen, O., Beckmann, R., Vazquez-Laslop, N., Wilson, D.N., Rodnina, M.V., Mankin, A. S. (2017). An antimicrobial peptide that inhibits translation by trapping release factors on the ribosome. *Nat. Struct. Mol. Biol.* *24*, 752-757.
- Gibson, D.G., Young, L., Chuang, R.Y., Venter, J.C., Hutchison, C.A., 3rd, and Smith, H.O. (2009). Enzymatic assembly of DNA molecules up to several hundred kilobases. *Nat. Methods* *6*, 343-345.
- Huerta-Cepas, J., Serra, F., and Bork, P. (2016). ETE 3: reconstruction, analysis, and visualization of phylogenomic data. *Mol. Biol. Evol.* *33*, 1635-1638.
- Kannan, K., Kanabar, P., Schryer, D., Florin, T., Oh, E., Bahroos, N., Tenson, T., Weissman, J.S., and Mankin, A.S. (2014). The general mode of translation inhibition by macrolide antibiotics. *Proc. Natl. Acad. Sci. U. S. A.* *111*, 15958-15963.
- Kannan, K., Vazquez-Laslop, N., and Mankin, A.S. (2012). Selective protein synthesis by ribosomes with a drug-obstructed exit tunnel. *Cell* *151*, 508-520.
- Kruger, J., and Rehmsmeier, M. (2006). RNAhybrid: microRNA target prediction easy, fast and flexible. *Nucleic Acids Res.* *34*, W451-454.
- Nakahigashi, K., Takai, Y., Kimura, M., Abe, N., Nakayashiki, T., Shiwa, Y., Yoshikawa, H., Wanner, B.L., Ishihama, Y., and Mori, H. (2016).

- Comprehensive identification of translation start sites by tetracycline-inhibited ribosome profiling. *DNA Res.* 23, 193-201.
- Notredame, C., Higgins, D.G., and Heringa, J. (2000). T-Coffee: A novel method for fast and accurate multiple sequence alignment. *J. Mol. Biol.* 302, 205-217.
- Oh, E., Becker, A.H., Sandikci, A., Huber, D., Chaba, R., Gloge, F., Nichols, R.J., Typas, A., Gross, C.A., Kramer, G., Weissman, J. S., Bukau, B. (2011). Selective ribosome profiling reveals the cotranslational chaperone action of trigger factor in vivo. *Cell* 147, 1295-1308.
- Orelle, C., Carlson, S., Kaushal, B., Almutairi, M.M., Liu, H., Ochabowicz, A., Quan, S., Pham, V.C., Squires, C.L., Murphy, B.T., Mankin, A. S. (2013). Tools for characterizing bacterial protein synthesis inhibitors. *Antimicrob. Agents Chemother.* 57, 5994-6004.
- Sievers, F., Wilm, A., Dineen, D., Gibson, T.J., Karplus, K., Li, W., Lopez, R., McWilliam, H., Remmert, M., Söding, J., *et al.* (2011). Fast, scalable generation of high-quality protein multiple sequence alignments using Clustal Omega. *Mol. Syst. Biol.* 7, 539.
- Whiteside, M.D., Winsor, G.L., Laird, M.R., and Brinkman, F.S. (2013). OrtholugeDB: a bacterial and archaeal orthology resource for improved comparative genomic analysis. *Nucleic Acids Res.* 41, D366-376.
- Wilson, D., Pethica, R., Zhou, Y., Talbot, C., Vogel, C., Madera, M., Chothia, C., and Gough, J. (2009). SUPERFAMILY-sophisticated comparative genomics, data mining, visualization and phylogeny. *Nucleic Acids Res.* 37, D380-386.
- Wstrand, M., and Sonnhammer, E.L. (2005). Improved profile HMM performance by assessment of critical algorithmic features in SAM and HMMER. *BMC Bioinformatics* 6, 99.
- Zhou, J., and Rudd, K.E. (2013). EcoGene 3.0. *Nucleic Acids Res.* 41, D613-624.
